1 **Evolution and cell-type specificity of human-specific genes**  
2 **preferentially expressed in progenitors of fetal neocortex**

3

4 **Marta Florio<sup>1§#</sup>, Michael Heide<sup>1§</sup>, Holger Brandl<sup>1</sup>, Anneline Pinson<sup>1</sup>, Sylke**  
5 **Winkler<sup>1</sup>, Pauline Wimberger<sup>3</sup>, Wieland B. Huttner<sup>1\*</sup> and Michael Hiller<sup>1,2\*</sup>**

6

7 <sup>1</sup>Max Planck Institute of Molecular Cell Biology and Genetics, Pfotenhauerstr. 108,  
8 D-01307 Dresden, Germany

9 <sup>2</sup>Max Planck Institute for the Physics of Complex Systems, Nöthnitzer Straße 38.  
10 D-01187 Dresden, Germany

11 <sup>3</sup>Technische Universität Dresden, Universitätsklinikum Carl Gustav Carus, Klinik und  
12 Poliklinik für Frauenheilkunde und Geburtshilfe, Fetscherstraße 74, D-01307 Dresden,  
13 Germany

14 <sup>§</sup>Joint first authors

15 <sup>#</sup>Present address: Department of Genetics, Harvard Medical School, Boston, MA 02115,  
16 USA

17

18 \*Corresponding authors:

19 [huttner@mpi-cbg.de](mailto:huttner@mpi-cbg.de)

20 [hiller@mpi-cbg.de](mailto:hiller@mpi-cbg.de)

21 **Abstract**

22 To understand the molecular basis underlying the expansion of the neocortex during  
23 primate, and notably human, evolution, it is essential to identify the genes that are  
24 particularly active in the neural stem and progenitor cells of developing neocortex.  
25 Here, we have used existing transcriptome datasets to carry out a comprehensive screen  
26 for protein-coding genes preferentially expressed in progenitors of fetal human  
27 neocortex. In addition to the previously studied gene *ARHGAP11B*, we show that ten  
28 known and two newly identified human-specific genes exhibit such expression,  
29 however with distinct neural progenitor cell-type specificity compared to their ancestral  
30 paralogs. Furthermore, we identify 41 additional human genes with progenitor-enriched  
31 expression which have orthologs only in primates. Our study not only provides a  
32 resource of genes that are candidates to exert specific, and novel, roles in neocortical  
33 development, but also reveals that distinct mechanisms gave rise to these genes during  
34 primate, and notably human, evolution.

35

36

37 **Introduction**

38

39 The expansion of the neocortex in the course of human evolution provides an essential  
40 basis for our cognitive abilities (Azevedo et al., 2009; Borrell and Reillo, 2012; Buckner  
41 and Krienen, 2013; Dehay et al., 2015; Florio and Huttner, 2014; Kaas, 2013; Lui et al.,  
42 2011; Namba and Huttner, 2017; Rakic, 2009; Sousa et al., 2017; Striedter, 2005). This  
43 expansion ultimately reflects an increase in the proliferative capacity of the neural stem  
44 and progenitor cells in the developing human neocortex (from now on collectively  
45 referred to as cortical neural progenitor cells, cNPCs) (Azevedo et al., 2009; Bae et al.,  
46 2015; Borrell and Reillo, 2012; Dehay et al., 2015; Florio and Huttner, 2014; Lui et al.,  
47 2011; Namba and Huttner, 2017; Rakic, 2009), as well as in the duration of their  
48 proliferative, neurogenic and gliogenic phases (Lewitus et al., 2014; Otani et al., 2016).  
49 It is therefore a fundamental task to elucidate the underlying molecular basis, that is, the  
50 changes in our genome that endow human cNPCs with these neocortical  
51 expansion-promoting properties.

52

53 One approach towards this goal is to identify which of the genes that are particularly  
54 active in human cNPCs exhibit a human-specific expression pattern, or even are  
55 human-specific. We previously isolated, and determined the transcriptomes of, two  
56 major cNPC types from embryonic mouse and fetal human neocortex (Florio et al.,  
57 2015), (i) the apical (or ventricular) radial glia (aRG), the primary neuroepithelial  
58 cell-derived apical progenitor type (Götz and Huttner, 2005; Kriegstein and Götz,  
59 2003), and (ii) the basal (or outer) radial glia (bRG), the key type of basal progenitor  
60 implicated in neocortical expansion (Betizeau et al., 2013; Borrell and Götz, 2014;  
61 Borrell and Reillo, 2012; Florio and Huttner, 2014; Lui et al., 2011). This led to the  
62 identification of 263 protein-coding human genes that are much more highly expressed  
63 in human bRG and aRG than in a neuron-enriched fraction (Florio et al., 2015). Of  
64 these, 207 genes have orthologs in the mouse genome but are not expressed in mouse  
65 cNPCs, whereas 56 genes lack mouse orthologs. Among the latter, the gene with the  
66 highest specificity of expression in bRG and aRG was found to be *ARHGAP11B*, a  
67 human-specific gene (Antonacci et al., 2014; Dennis et al., 2017; Riley et al., 2002;  
68 Sudmant et al., 2010) that we showed to be capable of basal progenitor amplification in



69 embryonic mouse neocortex and to likely have contributed to the evolutionary  
70 expansion of the human neocortex (Florio et al., 2015; Florio et al., 2016).

71

72 Our previous finding that, in addition to *ARHGAP11B*, there are 55 other human genes  
73 without mouse orthologs that are predominantly expressed in bRG and aRG (Florio et  
74 al., 2015), raises the possibility that some of these genes may be human-specific and  
75 may affect the behaviour of human cNPCs. To investigate the evolution and cell-type  
76 specificity of expression of such genes, we have now data-mined our previous dataset  
77 (Florio et al., 2015) as well as three additional ones (Fietz et al., 2012; Miller et al.,  
78 2014; Pollen et al., 2015) to carry out a comprehensive screen for protein-coding genes  
79 preferentially expressed in cNPCs of fetal human neocortex. We find that, in addition to  
80 *ARHGAP11B*, 12 other human-specific genes (10 previously and 2 newly identified  
81 ones) show preferential expression in cNPCs. Furthermore, we identify 41 additional  
82 human genes exhibiting such expression for which orthologs are found in primate but  
83 not in non-primate mammalian genomes. We provide information on the evolutionary  
84 mechanisms leading to the origin of several of these primate-specific genes, including  
85 gene duplication and transposition. Moreover, we analyze the cell-type specific

86 expression of most of the human-specific genes, including their splice variant  
87 expression patterns. Finally, by comparing the expression of the human-specific genes  
88 with their respective ancestral paralog, we show a substantial degree of gene expression  
89 divergence upon gene duplication, suggesting potential neofunctionalization. Our study  
90 thus provides a resource of genes that are candidates to exert specific roles in the  
91 development and evolution of the primate, and notably human, neocortex.  
92

93 **Results**

94

95 **Screen of distinct transcriptome datasets from fetal human neocortex for**  
96 **protein-coding genes preferentially expressed in neural stem and progenitor cells**

97 To identify genes preferentially expressed in the cNPCs of the fetal human neocortex,  
98 we analyzed four distinct, published transcriptome datasets obtained from human  
99 neocortical tissue ranging from 13 to 19 weeks post conception (wpc). First, the  
100 genome-wide RNA-Seq dataset obtained from specific neocortical zones isolated by  
101 laser capture microdissection (LCM) (Fietz et al., 2012), which we screened for all  
102 protein-coding genes that are more highly expressed in the VZ, iSVZ and/or oSVZ than  
103 the cortical plate (CP) (as determined by differential gene expression (DGE) analysis,  $p$   
104  $<0.01$ ). This yielded 2758 genes (Fig. 1A, B). Second, the Allen Brain Institute  
105 microarray dataset obtained from LCM-isolated specific neocortical zones (Miller et al.,  
106 2014), which we screened for all protein-coding genes with positive laminar correlation  
107 (correlation coefficient  $>0.5$ ) with either the VZ, iSVZ or oSVZ as compared to the  
108 zones enriched in postmitotic cells (intermediate zone (IZ), subplate, CP, marginal zone,  
109 subpial granular zone). This yielded 4555 genes (Fig. 1A, B). Third, the genome-wide

110 RNA-Seq dataset obtained from specific neocortical cell types isolated by  
111 fluorescence-activated cell sorting (FACS) (Florio et al., 2015), which we screened for  
112 all protein-coding genes more highly expressed (as determined by DGE analysis,  
113  $p < 0.01$ ) in aRG and/or bRG in S-G2-M as compared to the cell population enriched in  
114 postmitotic neurons but also containing bRG in G1. This yielded 2106 genes (Fig. 1A,  
115 B). Fourth, the dataset obtained from genome-wide single-cell RNA-Seq of dissociated  
116 cells captured from microdissected VZ and SVZ (Pollen et al., 2015), which we  
117 screened for all protein-coding genes positively correlated with either radial glial cells,  
118 bIPs or both (correlation coefficient  $> 0.1$ ) and negatively correlated with neurons  
119 (correlation coefficient  $< 0.1$ ). This yielded 5335 genes (Fig. 1A, B).

120

121 Next, we determined how many of the protein-coding genes exhibiting the above  
122 described differential expression pattern were found in all four datasets. This was the  
123 case for 780 genes (Fig. 1C, red). We also determined the number of genes found in  
124 three of the four datasets (four combinations, Fig. 1C orange), and of those found in two  
125 datasets (six combinations, Fig. 1C pink). Together this yielded a catalogue of 3,722

126 human genes with preferential expression in cNPCs (from here on referred to as  
127 cNPC-enriched genes) (see Table S1).

128

129 These 3,722 genes included well-known molecular players involved in cNPC function  
130 and established markers of cNPCs, notably radial glia, (e.g. *EOMES*, *FABP7*, *GFAP*,

131 *HOPX*, *NES*, *PAX6*, *SOX2*, *VIM*), cell proliferation (e.g. *MKI67*, *PCNA*), Notch

132 signaling (*DLL1*, *HES5*), and extracellular matrix and growth factor signaling (e.g.

133 *FGFR3*, *ITGAV*, *LUM*, *TNC*) (listed in Fig. 1D). Moreover, several genes recently

134 implicated in human-specific aspects of cNPC proliferation and neocortex formation

135 (Florio et al., 2017; Mitchell and Silver, 2017; Sousa et al., 2017) (e.g. *ARHGAP11B*,

136 *FOXP2*, *FZD8*, *GPR56*, *PDGFD*) were found in the analyzed datasets, though not

137 necessarily in all four (Fig. 1D). The latter finding, on the one hand, likely reflects the

138 diversity of the cNPC enrichment strategies and mode of transcriptome analysis adopted

139 to obtain the four datasets, and on the other hand highlights the significance of

140 data-mining all these datasets in combination. On a general note, the catalog of 3,722

141 cNPC-enriched human genes presented here (Table S1) provides an integrative and

142 methodologically unbiased tool to interrogate the cNPC enrichment of candidate genes

143 of interest, and to potentially uncover new genes involved in cNPC function during fetal  
144 human corticogenesis.

145

#### 146 **Identification of primate-specific genes**

147 Primate-specific, notably human-specific, genes expressed in cNPCs have gained  
148 increasing attention for their potential role in species-specific aspects of neocortical  
149 development, including neurogenesis (Charrier et al., 2012; Dennis et al., 2017; Florio  
150 et al., 2017; Sousa et al., 2017). To determine how many of the 3,722 human  
151 cNPC-enriched protein-coding genes had orthologs only in primates but not in  
152 non-primate species, we eliminated from this gene set all those genes with an annotated  
153 one-to-one ortholog in any of the sequenced non-primate genomes (Fig. 1E). This  
154 greatly reduced the number of genes from 3,722 to 83 genes.

155

156 Next, we examined these 83 genes to extract those that are truly primate-specific. By  
157 inspecting genomic alignments, gene neighborhoods and gene annotations in primate  
158 and non-primate mammals, we concluded that 29 of these genes likely have an ortholog  
159 in non-primate mammals and we therefore excluded them from further analysis. The

160 remaining 54 genes were considered to be truly primate-specific (Fig. 1E) and are of  
161 special evolutionary interest because of their orthology to the human cNPC-enriched  
162 protein-coding genes.

163

#### 164 **Phylogenetic analysis of the primate-specific genes**

165 To trace the phylogeny of the 54 primate-specific genes and to infer their ancestry, we  
166 investigated in which species these genes exhibit an intact reading frame, and used this  
167 information to assign each gene to a primate clade. First, we found that 28 of these 54  
168 genes exist in the genomes of tarsiers, monkeys and apes (though not necessarily in  
169 every species of these clades) and thus likely predate the ape (Hominoidea) ancestor  
170 that lived ~28 Mya (Kumar et al., 2017) (Fig. 2). Specifically, some of these 28 genes  
171 can already be detected in haplorrhini, some in simiiformes and some at first in  
172 catarrhini (Fig. 2). Strikingly, more than half of these 28 genes encode zinc finger  
173 proteins (Table 1). Second, we found that of the remaining 26 primate-specific genes  
174 that exist only in the genomes of apes (hominoidea), although not necessarily in every  
175 ape species (Fig. 2), 13 genes exist not only in the human genome but also in  
176 non-human ape genomes. It is interesting to note that 11 of these 13 genes exist only in

177 great apes (hominidae) and thus likely arose after the lineage split (~18 Mya, Kumar et  
178 al., 2017) leading to the gibbon vs. the great apes, and 8 of these 11 genes do not exist  
179 in the orangutan and thus likely arose after the great ape ancestor split into the  
180 orangutan and Homininae lineage ~15 Mya (Kumar et al., 2017) (Fig. 2). Of the two  
181 hominoidea-specific genes already detected in the gibbon, *PTTG2* deserves special  
182 comment and is further discussed below.

183

184 Finally, we found that 13 of the 54 primate-specific genes were only present in the  
185 human genome, and thus arose (or evolved to their present state) in the human lineage  
186 after its split from the lineage leading to the chimpanzee (Fig. 2) (~5-7 Mya, Brunet et  
187 al., 2005; Brunet et al., 2002; Vignaud et al., 2002). These 13 human-specific genes  
188 include *ARHGAP11B*, a gene that we reported previously to have a key role in cNPC  
189 proliferation and neocortex expansion (Florio et al., 2015; Florio et al., 2016) and that  
190 was also present in the archaic genomes of Neandertals and Denisovans (Antonacci et  
191 al., 2014; Florio et al., 2015; Meyer et al., 2012; Prüfer et al., 2014; Sudmant et al.,  
192 2010). Similar to *ARHGAP11B*, 11 of the remaining 12 human-specific genes existed  
193 also in the genomes of Neandertals and Denisovans (Dennis et al., 2017; Sudmant et al.,



194 2010) and present data, see Table 1) and thus arose before the split of the lineages  
195 leading to modern humans vs. Neandertals/Denisovans ~500,000 years ago (Meyer et  
196 al., 2012; Prüfer et al., 2014). Of note, *SMN2* is the only gene in this set that has been  
197 reported to have arisen in the lineage leading to modern humans after its divergence  
198 from the lineage leading to Neandertals and Denisovans (Dennis et al., 2017).

199

200 **Analysis of the evolution of selected primate-specific genes reveals distinct**  
201 **mechanisms**

202 Next, we sought to determine how these 54 primate-specific genes evolved. With regard  
203 to the primate-specific genes that are not human-specific, we focused on three genes  
204 that we selected in light of their potential biological role, *MICA*, *KIF4B* and *PTTG2*.

205

206 *MICA* (*MHC class I polypeptide-related sequence A*) is a paradigmatic example of a  
207 gene arising by gene duplication (Bailey et al., 2002; Eichler et al., 2004; Fortna et al.,  
208 2004; Hurles, 2004), a well-known driving force of genome evolution (Lynch and  
209 Conery, 2000). *MICA* arose by duplication of the widely occurring *MICB* gene. As  
210 *MICA* is found in the genomes of apes and Old-World monkeys (Catarrhini), but not

211 New-World monkeys (Fig. 2), this gene duplication presumably occurred after the  
212 separation of the lineages leading to New-World monkeys vs. and Catarrhini ~47 Mya  
213 (Kumar et al., 2017). *MICA* is the only gene among the 54 primate-specific genes  
214 analyzed in the present study that has an established relationship to the MHC locus  
215 (Bahram et al., 1994), pointing to a possible primate-specific interaction between  
216 cNPCs and cells of the immune system.

217

218 Besides gene duplication, however, other mechanisms were found to underlie the  
219 evolution of primate-specific genes. A notable example is *KIF4B* (*Kinesin Family*  
220 *Member 4B*), a gene encoding a kinesin involved in spindle organization during  
221 cytokinesis (Zhu et al., 2005). In fact, *KIF4B* is the only member of the kinesin  
222 superfamily among the 54 primate-specific genes. *KIF4B* is specific to apes, Old-World  
223 monkeys and New-World monkeys (Simiiformes, Fig. 2) and evolved by retroposition  
224 of *KIF4A*, a gene with a near-ubiquitous occurrence in the animal kingdom (Hirokawa  
225 et al., 2009). This retroposition involved the reverse transcription of a spliced *KIF4A*  
226 mRNA followed by insertion of the DNA into the genome as an intronless copy of  
227 *KIF4A*.

228 Similar to *KIF4B*, the primate-specific gene *PTTG2* (*pituitary tumor transforming 2*)  
229 arose by retroposition. Specifically, *PTTG2* arose by reverse transcription of the spliced  
230 mRNA of *PTTG1*, a gene encompassing five protein-coding exons conserved in reptiles,  
231 birds and mammals and implicated in promoting proliferation of pituitary tumor cells  
232 (Dominguez et al., 1998; Vlotides et al., 2007; Zhang et al., 1999). However, while  
233 *KIF4B* inserted into an intergenic locus (that however allowed its transcription), the  
234 intron-less protein-coding *PTTG2* inserted into intron 2 of the *TBC1D1* gene (Fig. 3A),  
235 which encodes a Rab-GTPase activating protein (Roach et al., 2007). This *PTTG2*  
236 retroposition event presumably occurred in the ancestor of New-World monkeys,  
237 Old-World monkeys and apes (simiiformes). Remarkably, after retroposition, the  
238 *PTTG2* gene underwent two principally different lines of evolution. In all  
239 non-hominoidea simiiformes (see Fig. 2), consistent with neutral evolution, *PTTG2*  
240 accumulated frameshifting deletions and translational stop codon mutations that cause  
241 premature termination of the open reading frame (Fig. 3B). In contrast, in hominoidea  
242 (apes and humans, see Fig. 2), the *PTTG2* reading frame remained open, with one  
243 noticeable change. This is a 1-bp insertion (T, see Fig. 3A) near the 3' end of the  
244 *PTTG2* open reading frame that causes a shift in the reading frame, resulting in a new

245 13-amino acid-long C-terminal sequence of PTTG2 in great apes (including human) (as  
246 opposed to 24 amino acids in PTTG1) (Fig. 3B). This PTTG2-specific sequence lacks  
247 the cluster of acidic residues found in the C-terminal sequence of PTTG1. In the case of  
248 the gibbon, however, the *PTTG2* gene carries (in addition to the 1-bp T insertion) a  
249 22-bp deletion a few nucleotides 5' to this insertion. This causes yet another shift in the  
250 reading frame that results in the replacement of the C-terminal 25 amino acids of the  
251 PTTG2 of great apes (including human) by an 18-amino acid-long sequence (Fig. 3B).  
252 The potential consequences of these changes in protein sequence for the function of  
253 PTTG2 with regard to cell proliferation are discussed below.

254

255 **A variety of evolutionary mechanisms gave rise to the human-specific**  
256 **cNPC-enriched protein-coding genes**

257 We next investigated how the 13 human-specific cNPC-enriched protein-coding genes  
258 evolved. Nine of them arose by duplications of entire genes (Bailey et al., 2002; Eichler  
259 et al., 2004; Fortna et al., 2004; Hurles, 2004) (Figure 4A). Two arose by partial gene  
260 duplication. These genes are *ARHGAP11B* and *NOTCH2NL* (Antonacci et al., 2014;  
261 Dennis et al., 2017; Dougherty et al., 2017; Riley et al., 2002). *ARHGAP11B* arose from

262 partial duplication of *ARHGAP11A*, which encodes a Rho GTPase activating protein  
263 (RhoGAP). *ARHGAP11B* comprises the entire GAP domain of *ARHGAP11A* but, due  
264 to a single-base substitution (C->G) creating a new splice donor site, encodes a protein  
265 with a truncated GAP domain followed by a unique, human-specific C-terminal amino  
266 acid sequence (Florio et al., 2015; Florio et al., 2016) (Fig. 4B).

267

268 The human-specific *NOTCH2NL* identified here as a cNPC-enriched gene arose from  
269 partial duplication of the *NOTCH2* gene (Fig. 4A) and comprises only those regions of  
270 the *NOTCH2* gene that give rise to a short *NOTCH2* splice variant (Ensembl transcript  
271 ENST00000602566.5). Similar to this short *NOTCH2* isoform, *NOTCH2NL* encodes  
272 only a short segment of the *NOTCH2* ectodomain. However, the protein encoded by the  
273 *NOTCH2NL* studied here is predicted to lack a signal peptide, which raises the issue of  
274 whether *NOTCH2NL* is secreted, and if so, via which pathway. Irrespective of this open  
275 question, we explored, in light of the importance of Notch signaling for cNPC  
276 behaviour (Imayoshi et al., 2013; Kawaguchi et al., 2008; Lui et al., 2011; Pierfelice et  
277 al., 2008; Wilkinson et al., 2013), a potential role of the *NOTCH2NL* mRNA and/or the  
278 *NOTCH2NL* protein in cNPCs by in utero electroporation of *NOTCH2NL* under the

279 control of a constitutive promoter into neocortical aRG of embryonic day (E) 13.5  
280 mouse embryos. Analysis by Ki67 immunofluorescence 48 hours after *NOTCH2NL*  
281 electroporation revealed an increase in cycling basal progenitors in the SVZ and IZ, but  
282 not in apical progenitors in the VZ (Fig. S1A, B). This finding was further corroborated  
283 by analysis of mitotic cNPCs using phosphohistone H3 immunofluorescence, which  
284 showed an increase in abventricular, but not ventricular, mitoses (Fig. S1C-E). Thus,  
285 forced expression of the human-specific *NOTCH2NL* gene in mouse embryonic  
286 neocortex appears to promote basal progenitor proliferation.

287

288 The remaining two human-specific cNPC-enriched protein-coding genes evolved in  
289 distinct ways. The *ZNF492* gene as such exists in the genomes of all non-human great  
290 apes. In the case of human, however, an exon of another zinc finger protein-encoding  
291 gene, *ZNF98*, inserted into the *ZNF492* locus, yielding a chimeric human-specific  
292 protein containing the repressor domain of *ZNF492* and the DNA binding domain of  
293 *ZNF98* (Fig. 4C). The *FAM182B* gene as such exists not only in human but also in  
294 chimpanzee, bonobo and gorilla. However, in bonobo and gorilla, a stop codon  
295 terminates the potential open reading frame soon after the initiator methionine, whereas

296 in human a single T→G substitution abolishes this stop codon and rescues the open  
297 reading frame to yield a 152-amino acid-long protein (Fig. 4D). In chimpanzee, the  
298 corresponding T is missing, resulting in a reading frame shift that predicts a shorter,  
299 52-amino acid-long polypeptide. Taken together, we conclude that the human-specific  
300 cNPC-enriched protein-coding genes evolved by a variety of evolutionary mechanisms.

301

302 We sought to corroborate that the human-specific cNPC-enriched protein-coding genes  
303 arising from complete or partial gene duplication indeed constitute additional gene  
304 copies (rather than reflecting the inability of distinguishing multiple gene copies in the  
305 genomes of the other great apes due to genome assembly issues). To this end, we used a  
306 quantitative genomic PCR approach. The idea was that primers targeting genomic  
307 regions that are identical in human, chimpanzee and bonobo and thus should amplify  
308 genomic DNA of the three species proportionally to the copy number of each gene in  
309 each species. As a proof of principle, we validated the known human-specific nature of  
310 the partially duplicated *ARHGAP11B* by designing primers to the regions that are  
311 identical between *ARHGAP11A* and *ARHGAP11B*. Using the bonobo gene as the  
312 standard, this resulted in a two-fold increase of the human PCR product compared to the

313 bonobo and chimpanzee, corroborating that *ARHGAP11B* is indeed a human-specific

314 partial gene duplication (Fig. 4E).

315

316 We used the same approach to validate the human-specific genes arising from complete

317 gene duplication. For four of these nine genes (*ANKRD20A2*, *ANKRD20A4*, *CBWD5*,

318 *DHRS4L2*) and for *NOTCH2NL*, we could not design primers that uniquely target these

319 genes as the respective genomic loci are not well resolved in the non-human great ape

320 genomes. Thus, the final validation of these putative human-specific genes awaits

321 improved genome assemblies. For the other five human-specific cNPC-enriched genes

322 (*FAM72B/C/D*, *GTF2H2C*, *SMN2*) and for the human-specific gene *GTF2H2B* for

323 which primers could be designed, genomic qPCR resulted in an estimated four human

324 copies of *FAM72*, three human copies of *GTF2H2* and two human copies of *SMN* (Fig.

325 4E), compared to only one copy in both chimpanzee and bonobo. This validated the

326 human-specific nature of these genes.

327



328 **Spatial mRNA expression analysis in fetal human neocortex of the human-specific**  
329 **cNPC-enriched protein-coding genes and of three selected primate- but not**  
330 **human-specific protein-coding genes**

331 Given that the 13 human-specific genes had emerged from a screen for cNPC-enriched  
332 genes, it was of interest to examine their spatial expression pattern in the various zones  
333 of the fetal human cortical wall. To this end, we performed in-situ hybridization (ISH)  
334 on 13 wpc human neocortex to determine the localization of their mRNAs. Depending  
335 on the gene under study, this analysis detected expression of either the human-specific  
336 gene only, or (if the ISH probe used could not distinguish between paralogs due to their  
337 sequence similarity) the mRNA of the ancestral paralog from which the duplication  
338 arose and – if existing – the mRNAs of yet other paralogs. Of note, for *ARHGAP11B*,  
339 we used a specific Locked Nucleic Acid (LNA) probe, which enabled us to distinguish  
340 the mRNA of *ARHGAP11B* from that of *ARHGAP11A* (Fig. S2). We could distinguish  
341 five types of gene expression patterns.

342

343 First, referred to as "VZ", mRNA expression essentially confined to the VZ, which was  
344 the case for *ANKRD20A1-4* and *NOTCH2NL* (Fig. 5A-B"). Second, referred to as "VZ

345 + iSVZ + oSVZ", mRNA expression in all three germinal zones but not in the CP,  
346 which was the case for *ARHGAP11B* (Fig. 5C-C"). Third, referred to as "VZ, iSVZ >  
347 oSVZ, CP", mRNA expression in all zones, however with markedly stronger staining in  
348 the VZ and iSVZ than in the oSVZ and CP, which was the case for *DHRS4L1-2*,  
349 *FAM72A-D* and *ZNF492* (Fig. 5D-F"). Fourth, referred to as "VZ > CP > iSVZ, oSVZ",  
350 mRNA expression in all zones, however with markedly stronger staining in the VZ and  
351 CP than in the iSVZ and oSVZ, which was the case for *GTF2H2A-C* (Fig. 5J-J"). Fifth,  
352 "referred to as VZ, CP > iSVZ, oSVZ", strong mRNA expression in the VZ and CP and  
353 lower mRNA expression in the iSVZ and oSVZ, which was the case for *CBWD1-7*,  
354 *FAM182A-B* and *SMNI-2* (Fig. 5G-I").

355

356 The strong ISH signal in the CP observed for the latter genes is nonetheless consistent  
357 with our conclusion, based on our approach of gene identification (Fig. 1), that the  
358 human-specific paralogs show enriched expression in cNPCs. Indeed, the published  
359 RNA-Seq data from specific LCM-isolated neocortical zones (Fietz et al., 2012)  
360 confirmed the ISH pattern for *CBWD1-7*, *FAM182A-B* and *SMNI-2* in that the sum of

361 their mRNA levels in the three germinal zones (VZ, iSVZ, oSVZ) was greater than the  
362 mRNA level in the CP.

363

364 We also examined by ISH the spatial expression pattern in the fetal human cortical wall  
365 of the three primate-specific genes *PTTG2*, *MICA* and *KIF4B*. Due to the high degree of  
366 similarity in nucleotide sequence this analysis also included the mRNA of the respective  
367 ancestral paralog. mRNA expression for *PTTG1/2* (Fig. 6A), *MICA/B* (Fig. 6B) and  
368 *KIF4A/B* (Fig. 6C) was robust in the human VZ and iSVZ, relatively low in the oSVZ,  
369 and moderate in the CP.

370

371 **Cell type-specific expression patterns of the human-specific cNPC-enriched**  
372 **protein-coding genes compared to the corresponding ancestral paralogs**

373 Complete or partial gene duplications often encompass the regulatory elements that  
374 control gene expression (Bailey et al., 2002; Eichler et al., 2004; Fortna et al., 2004;  
375 Hurles, 2004). This raises the question whether the human-specific cNPC-enriched  
376 protein-coding genes identified here exhibit similar cell-type expression patterns as their

377 respective ancestral paralogs, or whether expression differences have evolved during  
378 human evolution.

379

380 Given that we could not distinguish by ISH most of the human-specific genes from their  
381 respective ancestral paralog, we sought an additional approach to gain insight into the  
382 cell-type specificity of expression of the human-specific genes. Specifically, we used  
383 our previously reported cell-type-specific gene expression data from the human aRG  
384 population (aRG), the bRG population (bRG) and the neuron fraction (N) (Florio et al.,  
385 2015) and re-analyzed these data using Kallisto. Kallisto is a probabilistic algorithm to  
386 estimate absolute transcript abundance, which has been proven to be accurate in  
387 assigning RNA-Seq reads to specific transcripts, including those originating from  
388 highly similar paralog genes (Bray et al., 2016). We could confidently ascertain  
389 cell-type-specific mRNA expression profiles for 11 of the 13 human-specific genes and  
390 their corresponding ancestral paralog (Fig. 7, Table S4).

391

392 We first focused on changes in the total mRNA levels between the human-specific  
393 genes and their ancestral paralogs. With the exception of *CBWD5* and *NOTCH2NL*, for

394 which the total mRNA levels in aRG, bRG and N were in the same range as the  
395 corresponding ancestral paralog, we found that the majority of the human-specific genes  
396 showed markedly different mRNA expression levels compared to their ancestral  
397 paralog, which were either reduced (*ARHGAP11B*, *FAM72B/C/D*, *GTF2H2C*) or  
398 increased (*ANKRD20A2*, *ANKRD20A4*, *DHRS4L2*, *ZNF492*) (Fig. 7A, B). This reflects  
399 either changes in mRNA expression levels per cell, changes in the proportions of  
400 mRNA-expressing cells, or both. Irrespective of which is the case, this finding indicates  
401 that expression of these human-specific genes has indeed changed compared to their  
402 ancestral paralogs during human evolution – a potential indication of  
403 neofunctionalization.

404

405 Next, we asked whether the human-specific genes diverged in their pattern of  
406 expression in aRG vs. bRG vs. N from that of their ancestral paralogs. For five of the  
407 human-specific genes (*CBWD5*, *FAM72B/C/D* and *NOTCH2NL*), the pattern of relative  
408 mRNA levels in these cell types was similar to that of the respective ancestral paralog  
409 (Fig. 7A). In the case of the other six human-specific genes, we observed, relative to the  
410 mRNA level in aRG, either decreases (*ZNF492*) or increases (*ARHGAP11B*, *DHRS4L2*,

411 *GTF2H2C*) in the bRG mRNA level compared to respective ancestral paralog. We also  
412 observed decreases (*ANKRD20A2*, *ANKRD20A4*) or increases (*DHRS4L2*, *GTF2H2C*)  
413 in the N fraction mRNA level compared to the respective ancestral paralog (Fig. 7A).  
414 Of note, the increase in the *ARHGAPI1B* mRNA level in bRG as compared to aRG is  
415 consistent with the previously reported function of this gene in basal progenitor  
416 amplification (Florio et al., 2015; Florio et al., 2016). These findings suggest that these  
417 six human-specific genes underwent changes in regulatory elements at the  
418 transcriptional and/or post-transcriptional level.

419

420 To complement these data, we performed a second type of analysis. We identified  
421 paralog-specific sequencing reads (Suppl. Files S1-S8; see Suppl. Fig. S3A for  
422 illustration of a hypothetical example) using our previously reported RNA-Seq dataset  
423 (Florio et al., 2015), and then determined the number of paralog-specific sequencing  
424 reads for the 11 human-specific genes and their corresponding ancestral paralog in aRG,  
425 bRG and N (Suppl. Fig. S3B). This analysis largely corroborated the results shown in  
426 Fig. 7A, further pointing to expression changes in aRG vs. bRG vs. N for the  
427 human-specific genes in comparison to their corresponding ancestral paralogs.

428 We finally explored the complexity in cell-type-specific expression patterns by  
429 examining the differential mRNA expression of protein-coding splice variants of the  
430 human-specific genes. Specifically, we analyzed our aRG vs. bRG vs. N RNA-Seq data  
431 (Florio et al., 2015) for cell-type-specific gene expression and relative abundance of  
432 sequencing reads diagnostic of specific protein-coding splice variants of 10 of the 11  
433 human-specific cNPC-enriched genes shown in Fig. 7 (Suppl. Fig. S4). This showed,  
434 for most of these human-specific genes (*ANKRD20A2*, *ANKRD20A4*, *CBWD5*,  
435 *FAM72B/C*, *DHRS4L2*, *GTF2H2C*, *NOTCH2NL*), the preferential expression of certain  
436 splice variants. Moreover, this analysis revealed splice variants with preferential  
437 expression in either aRG, bRG or N for some of these human-specific genes (e.g.,  
438 *CBWD5*, *GTF2H2C*, *ARHGAP11B*). A notable case was *ARHGAP11B*, of which one  
439 splice variant (Ensembl transcript ENST00000428041.2), endowed with a shorter  
440 3'-UTR, was exclusively expressed in bRG whereas the other splice variant was  
441 enriched in aRG (Suppl. Fig. S4).

442

443 In summary, these analyses show that after duplication, the expression pattern of most  
444 of the resulting new, human-specific cNPC-enriched protein-coding genes evolved

445 differences in both the levels and cell-type specificity of their mRNAs compared to their

446 respective ancestral paralog.

447



448 **Discussion**

449

450 Our study not only provides a resource of genes that are candidates to exert specific  
451 roles in the development and evolution of the primate, and notably human, neocortex,  
452 but also has implications regarding (i) the emergence of these genes during primate  
453 evolution and (ii) the maintenance vs. modification of the cell-type specificity of their  
454 expression. As to their emergence during primate evolution, two aspects of our findings  
455 deserve comment. First, while entire or partial gene duplications were the underlying  
456 mechanism that gave rise to the majority of the human-specific cNPC-enriched  
457 protein-coding genes, as noted previously (Bailey et al., 2002; Eichler et al., 2004;  
458 Fortna et al., 2004; Hurles, 2004), our data reveal also other mechanisms of gene  
459 evolution such as exon duplication and replacement (*ZNF492*) and translational stop  
460 codon removal (*FAM182B*).

461

462 The latter notion is further underscored by our observation that of the three primate- but  
463 not human-specific genes studied here in greater detail, two (*KIF4B*, *PTTG2*) arose by  
464 retroposition (Brosius, 1991; Long et al., 2003; Marques et al., 2005) rather than gene

465 duplication. Here, *PTTG2* is a particularly interesting case in that its initially  
466 presumably open reading frame became closed during the evolution of non-hominoidea  
467 simiiformes but remained open during the evolution of hominoidea. This suggests that  
468 the functional role of *PTTG2* may be essential for the development of the neocortex of  
469 apes and human but not for that of New-World and Old-World monkeys. Given the  
470 expression of *PTTG2* in the germinal zones of fetal human neocortex and the fact that  
471 this gene is derived from *PTTG1*, which encodes a protein exhibiting tumorigenic  
472 activity (Vlotides et al., 2007), it appears possible that *PTTG2* may function to amplify  
473 cNPCs.

474

475 Second, of the 54 human genes that we identified in the present study as being  
476 primate-specific, as many as 13 (i.e. almost one quarter) are human-specific. This is a  
477 far greater percentage than would be expected if the former genes arose by a constant  
478 rate during primate evolution to modern humans. This in turn suggests that the latter  
479 cNPC-enriched protein-coding genes conveyed a selection advantage specifically  
480 during the evolution of the human neocortex.

481 As to the issue of maintenance vs. modification of the cell-type specificity of expression  
482 of the human-specific genes, it is striking to observe that the majority of these genes,  
483 although arising by entire or partial gene duplications, show marked differences not  
484 only in the level but also in the cNPC-type specificity of their mRNA expression  
485 compared to their ancestral paralog. For several of the human-specific genes, the  
486 corresponding spatial characteristics of their mRNA expression in the neocortical  
487 germinal zones could be corroborated by specific ISH. These data suggest that during  
488 human evolution these genes underwent specific changes in regulatory elements at the  
489 transcriptional and/or post-transcriptional level. This in turn raises the possibility that  
490 (at least some of) the human-specific genes characterized in the present study may be  
491 candidates to have contributed to the evolution of human-specific features of  
492 neocortical development.

493

494 In line with the latter consideration, we found that expressing the human-specific gene  
495 *NOTCH2NL* studied here in mouse embryonic neocortex increased the abundance of  
496 cycling basal progenitors, a hallmark of the developing human neocortex. Moreover, we  
497 previously showed that the human-specific function of *ARHGAP11B* in cNPCs arose by

498 a single nucleotide substitution that generated a new splice donor site, the use of which  
499 generates a novel human-specific C-terminal protein sequence that we implicate in  
500 basal progenitor amplification (Florio et al., 2015; Florio et al., 2016). Importantly, this  
501 single nucleotide substitution presumably occurred relatively recently during human  
502 evolution (Florio et al., 2016), that is, after the partial gene duplication event ~5 million  
503 years ago (Antonacci et al., 2014; Dennis et al., 2017; Riley et al., 2002). Furthermore,  
504 we have identified here an *ARHGAP11B* splice variant that is specifically expressed in  
505 human bRG (Fig. S4), the basal progenitor type thought to have a key role in neocortex  
506 expansion (Betizeau et al., 2013; Borrell and Götz, 2014; Borrell and Reillo, 2012;  
507 Florio and Huttner, 2014; Lui et al., 2011). Interestingly, in contrast to the other  
508 protein-coding *ARHGAP11B* splice variant detected, which contains a long 3'-UTR with  
509 predicted microRNA binding sites and which is predominantly expressed in aRG, the  
510 bRG-specific *ARHGAP11B* splice variant contains only a short 3'-UTR lacking  
511 predictable microRNA binding sites. This suggests that *ARHGAP11B* mRNAs may be  
512 subject to differential, microRNA-mediated, regulation depending on whether  
513 *ARHGAP11B* functions in the lineage progression from aRG to bRG or in bRG  
514 amplification. Taken together, our findings reveal genomic changes at a variety of

515 levels that gave rise to novel functions and patterns of expression in cNPCs and that are

516 likely relevant for the development and evolution of the human neocortex.

517

518 **Materials and Methods**

519

520 **Human fetal brain tissue**

521 Human fetal brain tissue was obtained from the Klinik und Poliklinik für  
522 Frauenheilkunde und Geburtshilfe, Universitätsklinikum Carl Gustav Carus of the  
523 Technische Universität Dresden, following elective termination of pregnancy and  
524 informed written maternal consent, and with approval of the local University Hospital  
525 Ethical Review Committees. The gestational age of the specimen used for ISH (13 weeks  
526 post conception, wpc) was assessed by ultrasound measurements of crown-rump length,  
527 as described previously (Florio et al., 2015). Immediately after termination of pregnancy,  
528 the tissue was placed on ice and transported to the lab. The sample was then transferred to  
529 ice-cold Tyrode's solution, and tissue fragments of cerebral cortex were identified and  
530 dissected. Tissue was fixed in 4% paraformaldehyde in 120 mM phosphate buffer (pH  
531 7.4) for 3 hours at room temperature followed by 24 hours at 4°C. Fixed tissue was then  
532 incubated in 30% sucrose overnight, embedded in Tissue-Tek OCT (Sakura), and frozen  
533 on dry ice. Cryosections of 12 µm were produced using a cryostat (Microm HM 560,  
534 Thermo Fisher Scientific) and stored at -20°C until processed for ISH.

535

536 **Identification of human cNPC-enriched protein-coding genes**

537 To identify genes the expression of which is enriched in human cNPCs, we screened  
538 differential gene expression data from four published datasets (Fietz et al., 2012; Florio  
539 et al., 2015; Miller et al., 2014; Pollen et al., 2015) generated from 12-19 wpc human  
540 fetal neocortex, using diverse cortical zone or cell type-enrichment strategies and modes  
541 of determination of RNA levels (summarized in Table S1).

542

543 Fietz et al., 2012 – This dataset was generated by RNA-Seq of the germinal zones (VZ,  
544 iSVZ, oSVZ) and CP isolated by LCM from the neocortex of six human fetuses ranging  
545 in gestational age from 12 to 16 wpc. We screened this dataset for protein-coding genes  
546 more highly expressed, across all stages, in either VZ, iSVZ or oSVZ than CP (as  
547 determined by DGE analysis,  $p < 0.01$ , (Fietz et al., 2012). The resulting data-subset  
548 contained 2,758 genes (Table S1, Fig. 1).

549

550 Miller et al., 2014 (BrainSpan Atlas of the Allen Brain Institute, Prenatal LMD  
551 Microarray, <http://www.brainspan.org/lcm/search/index.html>) – This dataset (Miller et

552 al., 2014) was generated by microarray RNA expression profiling of germinal zones  
553 (VZ, iSVZ, oSVZ) and neuron-enriched layers (IZ, subplate, CP, marginal zone, subpial  
554 granular zone) isolated by LCM from fetal human neocortex (for the purpose of the  
555 present analysis, only data obtained from two 15-16 wpc human fetuses were  
556 considered). We screened this dataset for protein-coding genes with highest correlation  
557 with either VZ, iSVZ or oSVZ (correlation coefficient >0.5) compared to all cortical  
558 regions analyzed. The resulting data-subset contained 4,555 genes (Table S1, Fig. 1).

559

560 Florio et al., 2015 – This dataset was generated by RNA-Seq of human radial glia  
561 subtypes (aRG and bRG) and CP neurons (N) isolated from the neocortex of two 13  
562 wpc human fetuses. These cell types were differentially labeled using a combination of  
563 fluorescent molecular markers, and isolated by FACS. By experimental design, only  
564 cells that exhibited apical plasma membrane and/or contacted the basal lamina were  
565 isolated. Moreover, the isolation of aRG and bRG was confined to cells that had  
566 duplicated their DNA, and the neuron fraction contained a minority of bRG in G1  
567 (Florio et al., 2015). We screened this dataset for protein-coding genes with higher



568 expression in either aRG or bRG than N (as determined by DGE analysis,  $p < 0.01$ ,

569 (Florio et al., 2015). The resulting data-subset contained 2,106 genes (Table S1, Fig. 1).

570

571 Pollen et al., 2015 – This dataset was generated by RNA-seq of single cells captured

572 from the VZ and SVZ microdissected from the neocortex of three 16.5-19 wpc human

573 fetuses. Cells were post-hoc attributed – based on gene expression profiling – to either

574 radial glia (aRG and bRG), intermediate progenitors (i.e. bIPs), or neurons (N). We

575 screened this dataset for genes positively correlated with either radial glia or bIPs

576 (correlation coefficient  $> 0.1$ , (Pollen et al., 2015) and negatively correlated with N

577 (correlation coefficient  $< 0.1$ , (Pollen et al., 2015). The resulting data-subset contained

578 5,335 genes (Table S1, Fig 1).

579

580 These data-subsets contain only protein-coding genes, which were identified and

581 selected using the Ensembl data-mining tool BioMart

582 (<http://www.ensembl.org/biomart/martview/>), implementing the Genome Reference

583 Consortium Human Build 38 (GRCh38.p10) dataset.

584 Next, we intersected the four data-subsets obtained. To do this, we converted all gene  
585 IDs contained in the four original datasets to match the latest Ensembl gene annotation  
586 (Ensembl v89) of the GRCh38.p10 genome assembly, and then searched for the  
587 co-occurrence of genes (or lack thereof) across the four data-subsets. This resulted in  
588 3,722 human cNPC-enriched protein-coding genes present in at least two of the four  
589 data-subsets (listed in Table S1, see also Fig. 1).

590

591 **Screening of human cNPC-enriched protein-coding genes for primate-specific**  
592 **orthologs**

593 The 3,722 human cNPC-enriched protein-coding genes were screened for the  
594 occurrence of one-to-one orthologs in non-primate species, using BioMart and  
595 implementing v89 Ensembl annotation of “1-to-1 orthologs”. All genes that had an  
596 annotated 1-to-1 ortholog in non-primate species were excluded from our four  
597 data-subsets. This yielded 83 genes that were candidates to be primate-specific.

598

599 We visualized whole genome alignments in the UCSC genome browser (Tyner et al.,  
600 2017) to manually analyze each of the 83 candidate primate-specific genes. To this end,

601 we inspected co-linear chains of local alignments (Kent et al., 2003) between the human  
602 hg38 genome assembly and the assemblies of non-primate mammals to check if the  
603 human gene locus aligned to non-primate mammals. For the genes that aligned to  
604 non-primate mammals, regardless of whether they aligned in a conserved or in a  
605 different context, we used gene annotations of the aligning species to assess which gene  
606 is annotated in the respective locus. For this purpose, we made use of gene annotations  
607 from Refseq, Ensembl (Aken et al., 2017) and CESAR (Sharma et al., 2016) (a method  
608 that transfers human gene annotations to other aligned genomes if the gene has an intact  
609 reading frame), and removed those candidate genes that likely have an aligning gene in  
610 non-primate mammals. This reduced the list of the 83 candidates to 54 genes that we  
611 considered as primate-specific.

612

### 613 **Tracing the evolution of the primate-specific genes in the primate lineage**

614 We traced the evolution of these 54 primate-specific genes in the primate lineage to  
615 determine which of these have orthologs, in non-human primates, to the corresponding  
616 54 human cNPC-enriched protein-coding genes, and which do not, and therefore are  
617 human-specific. To this end, we inspected co-linear alignment chains and a multiple

618 genome alignment that includes 17 non-human primate genomes (Sharma and Hiller,  
619 2017). For the genes that aligned to other primates, we used the CESAR annotations to  
620 check if a gene of interest has an intact reading frame in other species. We only  
621 considered a gene to be conserved if an intact reading frame is present in the respective  
622 species. For example, while *FAMI82* aligns in a conserved context to chimpanzee and  
623 gorilla, CESAR did not find an intact reading frame and did not annotate the gene;  
624 indeed, inspecting the multiple genome alignment revealed a frameshift in chimpanzee  
625 and a stop codon mutation in gorilla, showing that *FAMI82B* is likely a non-coding  
626 gene in non-human primates. Then, we assigned each gene to a node in the primate  
627 phylogeny (clade), based on the descending species that likely have an intact coding  
628 gene. Note that this inferred ancestry does not imply that all descending species have an  
629 intact gene. This is exemplified by *TMEM99*, which aligns to all great apes and has an  
630 intact reading frame in human and orangutan, but encodes no or a truncated protein in  
631 chimpanzee/bonobo (due to a frameshift mutation) and gorilla (due to a stop codon  
632 mutation).

633

634 We combined this analysis with BLAT searches using the human protein or human  
635 mRNA sequence to assess the number of aligning loci in other primates; however, this  
636 was not conclusive for highly complex loci such as the duplications involving  
637 *ANKRD20A* and *CBWD5* genes, where numerous similar genes and pseudogenes are  
638 present and the completeness of non-human primate genome assemblies is not certain  
639 due to the presence of assembly gaps. In addition, for human-specific candidates that  
640 arose by duplication, inspecting the respective genomic locus in the chimpanzee  
641 genome browser was useful, since human duplications are visible as additional,  
642 overlapping alignment chains.

643

#### 644 **Paralog-specific and isoform-specific gene expression**

645 To estimate expression differences among cNPC types between (a) given  
646 human-specific gene(s) and its/their highly similar ancestral paralog(s) in the human  
647 genome, we used the Kallisto probabilistic algorithm, which has been proven to be  
648 accurate in assigning reads to specific transcripts, including those originating from  
649 highly similar paralog genes in the human genome (Bray et al., 2016).

650 For this analysis, we used reads generated previously by RNA-Seq of human aRG, bRG  
651 and N (SRA Access, SRP052294, (Florio et al., 2015)) as input, GRCh38 as genome  
652 reference, and Ensembl v89 as genome annotation reference. Transcript abundances  
653 were output in Transcripts per Million (TPM) units. To compare expression between  
654 human-specific and ancestral paralog genes (Fig. 7), we extracted TPM values for all  
655 paralogs in each orthologous group, and summed the TPM values for all protein-coding  
656 transcripts (as per Ensembl annotation) for each gene. To compare expression between  
657 different splice variants produced by each human-specific gene (Fig S4), we extracted  
658 the TPM values specific for each individual splice variant and expressed the data  
659 relative to each other.

660

661 Kallisto's transcript abundance measurements represent a probabilistic approximation  
662 of actual transcript levels, and thus are an estimate. In order to compare actual paralog  
663 gene expression in distinct cNPC types and neurons, we performed a second type of  
664 analysis, which did not aim at providing an estimate of absolute transcript abundances,  
665 but rather at providing a precise determination of the relative gene expression  
666 differences between paralogs. To this end, we aligned mRNA sequences of ancestral

667 and human-specific paralogs in each orthology group, using Clustalw2  
668 (<http://www.ebi.ac.uk/Tools/msa/clustalw2/>), and manually identified the homologous  
669 (but not identical) core sequence of each alignment (Suppl. Files S1-S8; see Fig. S3A  
670 for illustration of a hypothetical example). The corresponding sequences of each  
671 paralog – of same length by design – were used as reference for previously generated  
672 RNA-Seq reads from aRG, bRG and N (SRA Access, SRP052294, (Florio et al., 2015))  
673 in order to search for paralog-specific mRNA reads. Reads aligning to both, ancestral  
674 and human-specific paralogs, were discarded as ambiguous, and only those reads  
675 aligning to paralog-specific sites (SNPs or indels), referred to as paralog-specific reads,  
676 were used for quantification (Fig S3B). This stringent alignment was carried out using  
677 bowtie1 (bowtie -Sp 5 -m 1 -v0).

678

679 It should be noted that, in contrast to the Kallisto-based analysis, the latter type of  
680 analysis does not distinguish between reads that originate from protein-coding and  
681 non-protein-coding transcripts of a given gene. Therefore, the quantifications shown in  
682 Fig. S3B reflect counts of all reads mapping to a given gene, whereas the

683 quantifications shown in Fig. 4 reflect summed counts of protein-coding gene  
684 transcripts only.

685

#### 686 **Genomic qPCR**

687 Genomic DNA was obtained from EBV-transformed B cells of human, bonobo and  
688 chimpanzee, as described previously (Prüfer et al., 2012). Primers (Table S2) were  
689 designed for two different amplicons per orthologous gene group to bind to the same  
690 region of the human-specific gene(s) under study, its human paralog(s), and the  
691 chimpanzee and bonobo orthologs. Only one mismatch in the primer binding sequence  
692 between the reference genomes of the three species was allowed.

693

694 qPCR was performed on human, chimpanzee and bonobo genomic DNA, using either  
695 the ABSolute qPCR SYBR Greenmix (Thermo Fisher Scientific) on a Mx3000P qPCR  
696 System (Stratagene) or the Fast Start Essential DNA Green Master (Roche) on a  
697 Lightcycler 96 (Roche). The relative copy number between the three species was  
698 determined by the comparative cycle threshold (Ct) approach (Livak and Schmittgen,  
699 2001) as follows. The Ct values for the human, chimpanzee and bonobo genes under



700 study were normalized to the Ct value of the highly conserved single-copy gene *STX12*.

701 The normalized values were then compared between the three species, using bonobo as

702 reference, to determine the relative copy number.

703

#### 704 **In utero electroporation and tissue processing**

705 In utero electroporation was performed on C57BL/6J mice in agreement with German

706 Animal Welfare Legislation, as described previously (Florio et al., 2015). Pregnant

707 dams carrying E13.5 embryos were deeply anesthetized using isoflurane. Embryos were

708 injected into the lateral ventricle with either 1  $\mu\text{g}/\mu\text{l}$  of pCAGGS-NOTCH2NL and 0.5

709  $\mu\text{g}/\mu\text{l}$  of pCAGGS-GFP or 1  $\mu\text{g}/\mu\text{l}$  of empty pCAGGS and 0.5  $\mu\text{g}/\mu\text{l}$  of pCAGGS-GFP

710 in PBS containing 0.1% Fast Green, followed by electroporation (30 V, six 50-msec

711 pulses with 1 sec intervals). Electroporated cerebral cortices were dissected at E15.5

712 and fixed overnight at 4°C in 4% paraformaldehyde in 120 mM phosphate buffer (pH

713 7.4). Fixed cortices were incubated in 20% sucrose for 24 hours at 4°C. Cortices were

714 embedded in Tissue-TEK (O.C.T, Sakura Finetek) and stored at -20°C.

715

716

717 **Immunofluorescence**

718 Cryosections of 20  $\mu\text{m}$  were prepared. Cryosections were first rehydrated in PBS.  
719 Antigen retrieval was performed for 1 hour at 70°C in 0.01 M citrate. Cryosections were  
720 permeabilized by treatment with 0.1% Triton X-100 in PBS for 30 min. Cryosections  
721 were quenched for 30 min in 0.1 M glycine in PBS, blocked in 0.2% gelatin, 300 mM  
722 NaCl, and 0.3% Triton X-100 in PBS, and incubated overnight at 4°C with primary  
723 antibodies (Ki67, rabbit, Abcam, Ab15580, 1/500; PH3, rat, Abcam, Ab10543, 1/1000;  
724 GFP, chicken, Abcam, Ab13970, 1/1000). Appropriate secondary antibodies were  
725 incubated for 2 hours at room temperature (Alexa Fluor 488, 594, Molecular Probes,  
726 1:500; DAPI, Sigma, 1/1000). Cryosections were mounted in Mowiol (Merck  
727 Biosciences).

728

729 **In-situ hybridization**

730 Templates were amplified by PCR (see Table S3 for primer sequences) from  
731 oligo-dT-primed cDNA prepared from fetal human neocortex total RNA, and RNA  
732 probes directed against the mRNA(s) of a given human-specific gene and (if applicable)  
733 its paralog(s) in the human genome were synthesized using the DIG RNA labeling Mix

734 (Roche). The *ARHGAP11B* LNA probe was designed with the Custom LNA mRNA  
735 Detection Probe design tool (Exiqon), focusing only on the sequence spanning the  
736 *ARHGAP11B* exon5–exon6 boundary, where *ARHGAP11B* is sufficiently different  
737 from *ARHGAP11A* (see Fig. S2) (Florio et al., 2016), and searching for hybridization  
738 with a predicted RNA melting temperature of 85°C. The LNA probe  
739 (5'-AGTCTGGTACACGCCCTTCTTTTCT-3') was synthesized and labelled with  
740 digoxigenin at the 5' and 3' ends (Exiqon).

741

742 In-situ hybridization was performed on 12- $\mu$ m cryosections of 13 wpc fetal human  
743 neocortex and on COS-7 cells. Prior to the hybridization step, cryosections/cells were  
744 sequentially treated with 0.2 M HCl (2x 5 min, room temperature) and then with  
745 6  $\mu$ g/ml proteinase K in PBS, pH 7.4 (20 min, room temperature). Hybridization was  
746 performed overnight at 65°C with either 20 ng/ $\mu$ l of a given RNA probe or 40 nM  
747 *ARHGAP11B* LNA probe. TSA Plus DIG detection Kit (Perkin Elmer) was used for  
748 signal amplification, and the signal was detected immunohistochemically with mouse  
749 anti-digoxigenin HRP antibody (Perkin Elmer) and NBT/BCIP (Roche) as color  
750 substrate.

751

752 **Image acquisition**

753 ISH images were acquired on a Zeiss Axio Scan slide scanner, and processed using

754 ImageJ. Fluorescent images of electroporated neocortex were acquired using a Zeiss

755 laser scanning confocal microscope 700 using a 20x objective. Quantifications were

756 performed using Fiji.

757 **Acknowledgements**

758

759 We are grateful to the Computer Service Facilities of the MPI-CBG and MPI-PKS and  
760 to other services and facilities of the MPI-CBG for the outstanding support provided,  
761 notably J. Helppi and his team from the Animal Facility and Jan Peychl and his team  
762 from the Light Microscopy Facility. We thank Robert Lachmann for providing fetal  
763 human tissue, Hella Hartmann of the CRTD of the Technische Universität Dresden for  
764 help with the acquisition of the ISH images, and members of the Huttner laboratory for  
765 critical discussion. We are grateful to Dr. Tomislav Maricic (MPI for Evolutionary  
766 Anthropology) for donating human, chimpanzee and bonobo genomic DNA. M.F.  
767 would like to thank Dr. Fenna Krienen (Harvard Medical School) for helpful discussion  
768 and critical reading of the manuscript. M.F. was a member of the International Max  
769 Planck Research School for Cell, Developmental and Systems Biology and a doctoral  
770 student at Technische Universität Dresden. W.B.H. was supported by grants from the  
771 Deutsche Forschungsgemeinschaft (DFG) (SFB 655, A2), the European Research  
772 Council (250197), and ERA-NET NEURON (MicroKin).

773

774 **Competing interests**

775 The authors declare that no competing interests exist.

776

777 **References**

778

- 779 Aken, B.L., Achuthan, P., Akanni, W., Amode, M.R., Bernsdorff, F., Bhai, J.,  
780 Billis, K., Carvalho-Silva, D., Cummins, C., Clapham, P., *et al.* (2017).  
781 Ensembl 2017. *Nucleic Acids Res* *45*, D635-D642.
- 782 Antonacci, F., Dennis, M.Y., Huddleston, J., Sudmant, P.H., Steinberg, K.M.,  
783 Rosenfeld, J.A., Miroballo, M., Graves, T.A., Vives, L., Malig, M., *et al.*  
784 (2014). Palindromic GOLGA8 core duplicons promote chromosome 15q13.3  
785 microdeletion and evolutionary instability. *Nat Genet* *46*, 1293-1302.
- 786 Azevedo, F.A.C., Carvalho, L.R.B., Grinberg, L.T., Farfel, J.M., Ferretti,  
787 R.E.L., Leite, R.E.P., Jacob, W., Lent, R., and Herculano-Houzel, S. (2009).  
788 Equal Numbers of Neuronal and Nonneuronal Cells Make the Human Brain  
789 an Isometrically Scaled-Up Primate Brain. *J Comp Neurol* *513*, 532-541.
- 790 Bae, B.I., Jayaraman, D., and Walsh, C.A. (2015). Genetic changes shaping  
791 the human brain. *Dev Cell* *32*, 423-434.
- 792 Bahram, S., Bresnahan, M., Geraghty, D.E., and Spies, T. (1994). A second  
793 lineage of mammalian major histocompatibility complex class I genes. *Proc*  
794 *Natl Acad Sci U S A* *91*, 6259-6263.
- 795 Bailey, J.A., Gu, Z., Clark, R.A., Reinert, K., Samonte, R.V., Schwartz, S.,  
796 Adams, M.D., Myers, E.W., Li, P.W., and Eichler, E.E. (2002). Recent  
797 segmental duplications in the human genome. *Science* *297*, 1003-1007.
- 798 Betizeau, M., Cortay, V., Patti, D., Pfister, S., Gautier, E., Bellemin-Ménard,  
799 A., Afanassieff, M., Huissoud, C., Douglas, R.J., Kennedy, H., *et al.* (2013).  
800 Precursor diversity and complexity of lineage relationships in the outer  
801 subventricular zone of the primate. *Neuron* *80*, 442-457.
- 802 Borrell, V., and Götz, M. (2014). Role of radial glial cells in cerebral cortex  
803 folding. *Curr Opin Neurobiol* *27*, 39-46.
- 804 Borrell, V., and Reillo, I. (2012). Emerging roles of neural stem cells in  
805 cerebral cortex development and evolution. *Dev Neurobiol* *72*, 955-971.
- 806 Bray, N.L., Pimentel, H., Melsted, P., and Pachter, L. (2016). Near-optimal  
807 probabilistic RNA-seq quantification. *Nat Biotech* *34*, 525-527.
- 808 Brosius, J. (1991). Retroposons - Seeds of Evolution. *Science* *251*, 753-753.

809 Brunet, M., Guy, F., Pilbeam, D., Lieberman, D.E., Likius, A., Mackaye,  
810 H.T., Ponce de Leon, M.S., Zollikofer, C.P.E., and Vignaud, P. (2005). New  
811 material of the earliest hominid from the Upper Miocene of Chad. *Nature*  
812 *434*, 752-755.

813 Brunet, M., Guy, F., Pilbeam, D., Mackaye, H.T., Likius, A., Ahounta, D.,  
814 Beauvilain, A., Blondel, C., Bocherens, H., Boisserie, J.-R., *et al.* (2002). A  
815 new hominid from the Upper Miocene of Chad, Central Africa. *Nature* *418*,  
816 145-151.

817 Buckner, R.L., and Krienen, F.M. (2013). The evolution of distributed  
818 association networks in the human brain. *Trends Cogn Sci* *17*, 648-665.

819 Charrier, C., Joshi, K., Coutinho-Budd, J., Kim, J.E., Lambert, N., de  
820 Marchena, J., Jin, W.L., Vanderhaeghen, P., Ghosh, A., Sassa, T., *et al.*  
821 (2012). Inhibition of SRGAP2 function by its human-specific paralogs  
822 induces neoteny during spine maturation. *Cell* *149*, 923-935.

823 Dehay, C., Kennedy, H., and Kosik, K.S. (2015). The outer subventricular  
824 zone and primate-specific cortical complexification. *Neuron* *85*, 683-694.

825 Dennis, M.Y., Harshman, L., Nelson, B.J., Penn, O., Cantsilieris, S.,  
826 Huddleston, J., Antonacci, F., Penewit, K., Denman, L., Raja, A., *et al.*  
827 (2017). The evolution and population diversity of human-specific segmental  
828 duplications. *J*, 0069.

829 Dominguez, A., Ramos-Morales, F., Romero, F., Rios, R.M., Dreyfus, F.,  
830 Tortolero, M., and Pintor-Toro, J.A. (1998). hpttg, a human homologue of rat  
831 pttg, is overexpressed in hematopoietic neoplasms. Evidence for a  
832 transcriptional activation function of hPTTG. *Oncogene* *17*, 2187-2193.

833 Dougherty, M.L., Nuttle, X., Penn, O., Nelson, B.J., Huddleston, J., Baker,  
834 C., Harshman, L., Duyzend, M.H., Ventura, M., Antonacci, F., *et al.* (2017).  
835 The birth of a human-specific neural gene by incomplete duplication and  
836 gene fusion. *Genome Biol* *18*, 49.

837 Eichler, E.E., Clark Ra Fau - She, X., and She, X. (2004). An assessment of  
838 the sequence gaps: unfinished business in a finished human genome.

839 Fietz, S.A., Lachmann, R., Brandl, H., Kircher, M., Samusik, N., Schroder,  
840 R., Lakshmanaperumal, N., Henry, I., Vogt, J., Riehn, A., *et al.* (2012).  
841 Transcriptomes of germinal zones of human and mouse fetal neocortex



842 suggest a role of extracellular matrix in progenitor self-renewal. *Proc Natl*  
843 *Acad Sci U S A* *109*, 11836-11841.

844 Florio, M., Albert, M., Taverna, E., Namba, T., Brandl, H., Lewitus, E.,  
845 Haffner, C., Sykes, A., Wong, F.K., Peters, J., *et al.* (2015). Human-specific  
846 gene ARHGAP11B promotes basal progenitor amplification and neocortex  
847 expansion. *Science* *347*, 1465-1470.

848 Florio, M., Borrell, V., and Huttner, W.B. (2017). Human-specific genomic  
849 signatures of neocortical expansion. *Curr Opin Neurobiol* *42*, 33-44.

850 Florio, M., and Huttner, W.B. (2014). Neural progenitors, neurogenesis and  
851 the evolution of the neocortex. *Development* *141*, 2182-2194.

852 Florio, M., Namba, T., Pääbo, S., Hiller, M., and Huttner, W.B. (2016). A  
853 single splice site mutation in human-specific *ARHGAP11B*  
854 causes basal progenitor amplification. *Science advances* *2*.

855 Fortna, A., Kim, Y., MacLaren, E., Marshall, K., Hahn, G., Meltesen, L.,  
856 Brenton, M., Hink, R., Burgers, S., Hernandez-Boussard, T., *et al.* (2004).  
857 Lineage-specific gene duplication and loss in human and great ape evolution.  
858 *PLoS Biol* *2*, E207.

859 Götz, M., and Huttner, W.B. (2005). The cell biology of neurogenesis. *Nat*  
860 *Rev Mol Cell Biol* *6*, 777-788.

861 Hirokawa, N., Noda, Y., Tanaka, Y., and Niwa, S. (2009). Kinesin  
862 superfamily motor proteins and intracellular transport. *Nat Rev Mol Cell*  
863 *Biol* *10*, 682-696.

864 Hurles, M. (2004). Gene duplication: the genomic trade in spare parts. *PLoS*  
865 *Biol* *2*, E206.

866 Imayoshi, I., Shimojo, H., Sakamoto, M., Ohtsuka, T., and Kageyama, R.  
867 (2013). Genetic visualization of notch signaling in mammalian neurogenesis.  
868 *Cellular and Molecular Life Sciences* *70*, 2045-2057.

869 Kaas, J.H. (2013). The evolution of brains from early mammals to humans.  
870 *Wiley interdisciplinary reviews Cognitive science* *4*, 33-45.

871 Kawaguchi, A., Ikawa, T., Kasukawa, T., Ueda, H.R., Kurimoto, K., Saitou,  
872 M., and Matsuzaki, F. (2008). Single-cell gene profiling defines differential  
873 progenitor subclasses in mammalian neurogenesis. *Development* *135*,  
874 3113-3124.

875 Kent, W.J., Baertsch, R., Hinrichs, A., Miller, W., and Haussler, D. (2003).  
876 Evolution's cauldron: Duplication, deletion, and rearrangement in the mouse  
877 and human genomes. *Proceedings of the National Academy of Sciences* *100*,  
878 11484-11489.

879 Kriegstein, A.R., and Götz, M. (2003). Radial glia diversity: a matter of cell  
880 fate. *Glia* *43*, 37-43.

881 Kumar, S., Stecher, G., Suleski, M., and Hedges, S.B. (2017). TimeTree: A  
882 Resource for Timelines, Timetrees, and Divergence Times. *Mol Biol Evol* *34*,  
883 1812-1819.

884 Lewitus, E., Kelava, I., Kalinka, A.T., Tomancak, P., and Huttner, W.B.  
885 (2014). An adaptive threshold in mammalian neocortical evolution. *PLoS*  
886 *Biol* *12*, e1002000.

887 Livak, K.J., and Schmittgen, T.D. (2001). Analysis of relative gene  
888 expression data using real-time quantitative PCR and the 2<sup>-</sup>(Delta Delta  
889 C(T)) Method. *Methods* *25*, 402-408.

890 Long, M., Betran, E., Thornton, K., and Wang, W. (2003). The origin of new  
891 genes: glimpses from the young and old. *Nat Rev Genet* *4*, 865-875.

892 Lui, J.H., Hansen, D.V., and Kriegstein, A.R. (2011). Development and  
893 evolution of the human neocortex. *Cell* *146*, 18-36.

894 Lynch, M., and Conery, J.S. (2000). The Evolutionary Fate and  
895 Consequences of Duplicate Genes. *Science* *290*, 1151-1155.

896 Marques, A.C., Dupanloup, I., Vinckenbosch, N., Reymond, A., and  
897 Kaessmann, H. (2005). Emergence of young human genes after a burst of  
898 retroposition in primates. *PLoS Biol* *3*, e357.

899 Meyer, M., Kircher, M., Gansauge, M.T., Li, H., Racimo, F., Mallick, S.,  
900 Schraiber, J.G., Jay, F., Prufer, K., de Filippo, C., *et al.* (2012). A  
901 high-coverage genome sequence from an archaic Denisovan individual.  
902 *Science* *338*, 222-226.

903 Miller, J.A., Ding, S.L., Sunkin, S.M., Smith, K.A., Ng, L., Szafer, A., Ebbert,  
904 A., Riley, Z.L., Royall, J.J., Aiona, K., *et al.* (2014). Transcriptional landscape  
905 of the prenatal human brain. *Nature* *508*, 199-206.

906 Mitchell, C., and Silver, D.L. (2017). Enhancing our brains: Genomic  
907 mechanisms underlying cortical evolution. *Semin Cell Dev Biol*.

908 Namba, T., and Huttner, W.B. (2017). Neural progenitor cells and their role  
909 in the development and evolutionary expansion of the neocortex. *Wiley*  
910 *Interdiscip Rev Dev Biol* *6*, e256.

911 Otani, T., Marchetto, M.C., Gage, F.H., Simons, B.D., and Livesey, F.J.  
912 (2016). 2D and 3D Stem Cell Models of Primate Cortical Development  
913 Identify Species-Specific Differences in Progenitor Behavior Contributing to  
914 Brain Size. *Cell Stem Cell* *18*, 467-480.

915 Pierfelice, T.J., Schreck, K.C., Eberhart, C.G., and Gaiano, N. (2008). Notch,  
916 Neural Stem Cells, and Brain Tumors. *Cold Spring Harb Symp Quant Biol*  
917 *73*, 367-375.

918 Pollen, A.A., Nowakowski, T.J., Chen, J., Retallack, H., Sandoval-Espinosa,  
919 C., Nicholas, C.R., Shuga, J., Liu, S.J., Oldham, M.C., Diaz, A., *et al.* (2015).  
920 Molecular Identity of Human Outer Radial Glia during Cortical  
921 Development. *Cell* *163*, 55-67.

922 Prüfer, K., Munch, K., Hellmann, I., Akagi, K., Miller, J.R., Walenz, B.,  
923 Koren, S., Sutton, G., Kodira, C., Winer, R., *et al.* (2012). The bonobo genome  
924 compared with the chimpanzee and human genomes. *Nature* *486*, 527-531.

925 Prüfer, K., Racimo, F., Patterson, N., Jay, F., Sankararaman, S., Sawyer, S.,  
926 Heinze, A., Renaud, G., Sudmant, P.H., de Filippo, C., *et al.* (2014). The  
927 complete genome sequence of a Neanderthal from the Altai Mountains.  
928 *Nature* *505*, 43-49.

929 Rakic, P. (2009). Evolution of the neocortex: a perspective from  
930 developmental biology. *Nat Rev Neurosci* *10*, 724-735.

931 Riley, B., Williamson, M., Collier, D., Wilkie, H., and Makoff, A. (2002). A  
932 3-Mb map of a large segmental duplication overlapping the alpha7-nicotinic  
933 acetylcholine receptor gene (CHRNA7) at human 15q13-q14. *Genomics* *79*,  
934 197-209.

935 Roach, W.G., Chavez, J.A., Miinea, C.P., and Lienhard, G.E. (2007).  
936 Substrate specificity and effect on GLUT4 translocation of the Rab  
937 GTPase-activating protein Tbc1d1. *Biochem J* *403*, 353-358.

938 Sharma, V., Elghafari, A., and Hiller, M. (2016). Coding exon-structure  
939 aware realigner (CESAR) utilizes genome alignments for accurate  
940 comparative gene annotation. *Nucleic Acids Res* *44*, e103-e103.

941 Sharma, V., and Hiller, M. (2017). Increased alignment sensitivity improves  
942 the usage of genome alignments for comparative gene annotation. *Nucleic  
943 Acids Res* *45*, 8369-8377.

944 Sousa, A.M.M., Meyer, K.A., Santpere, G., Gulden, F.O., and Sestan, N.  
945 (2017). Evolution of the Human Nervous System Function, Structure, and  
946 Development. *Cell* *170*, 226-247.

947 Striedter, G.F. (2005). *Principles of Brain Evolution* (Sinauer Associates  
948 Inc.).

949 Sudmant, P.H., Kitzman, J.O., Antonacci, F., Alkan, C., Malig, M., Tsalenko,  
950 A., Sampas, N., Bruhn, L., Shendure, J., and Eichler, E.E. (2010). Diversity  
951 of human copy number variation and multicopy genes. *Science* *330*, 641-646.

952 Tyner, C., Barber, G.P., Casper, J., Clawson, H., Diekhans, M., Eisenhart,  
953 C., Fischer, C.M., Gibson, D., Gonzalez, J.N., Guruvadoo, L., *et al.* (2017).  
954 The UCSC Genome Browser database: 2017 update. *Nucleic Acids Res* *45*,  
955 D626-D634.

956 Vignaud, P., Douring P Fau - Mackaye, H.T., Mackaye Ht Fau - Likius, A.,  
957 Likius A Fau - Blondel, C., Blondel C Fau - Boissarie, J.-R., Boissarie Jr Fau  
958 - De Bonis, L., De Bonis L Fau - Eisenmann, V., Eisenmann V Fau - Etienne,  
959 M.-E., Etienne Me Fau - Geraads, D., Geraads D Fau - Guy, F., *et al.* (2002).  
960 Geology and palaeontology of the Upper Miocene Toros-Menalla hominid  
961 locality, Chad.

962 Vlotides, G., Eigler, T., and Melmed, S. (2007). Pituitary tumor-transforming  
963 gene: physiology and implications for tumorigenesis. *Endocrine reviews* *28*,  
964 165-186.

965 Wilkinson, G., Dennis, D., and Schuurmans, C. (2013). Proneural genes in  
966 neocortical development. *Neuroscience* *253*, 256-273.

967 Zhang, X., Horwitz, G.A., Prezant, T.R., Valentini, A., Nakashima, M.,  
968 Bronstein, M.D., and Melmed, S. (1999). Structure, expression, and function  
969 of human pituitary tumor-transforming gene (PTTG). *Molecular  
970 endocrinology* (Baltimore, Md) *13*, 156-166.

971 Zhu, C., Zhao, J., Bibikova, M., Levenson, J.D., Bossy-Wetzell, E., Fan, J.-B.,  
972 Abraham, R.T., and Jiang, W. (2005). Functional Analysis of Human  
973 Microtubule-based Motor Proteins, the Kinesins and Dyneins, in

974 Mitosis/Cytokinesis Using RNA Interference. *Molecular Biology of the Cell*

975 *16*, 3187-3199.

976

977

978 **Figure Legends**

979

980 **Fig. 1. A screen for human cNPC-enriched protein-coding genes and**  
981 **determination which of them have orthologs only in primates.**

982 (A) Cartoon illustrating the main zones and neural cell types in the fetal human cortical  
983 wall that were screened for differential gene expression in the human transcriptome  
984 datasets as depicted in (B). Adapted from (Florio et al., 2017). SP, subplate; MZ,  
985 marginal zone.

986 (B) The indicated four published transcriptome datasets from fetal human neocortical  
987 tissue (Fietz et al., 2012; Miller et al., 2014) and cell populations (Florio et al., 2015;  
988 Pollen et al., 2015) were screened for protein-coding genes showing higher levels of  
989 mRNA expression in the indicated germinal zones and cNPC types than in than in the  
990 non-proliferative zones and neurons.

991 (C) Venn diagram showing the data-subsets of human protein-coding genes displaying  
992 the differential gene expression pattern depicted in (B). Numbers within the diagram  
993 indicate genes found in two (pink), three (yellow) or all four (red) data-subsets. Genes  
994 found in at least two data-subsets were considered as being cNPC-enriched.

995 (D) Selected genes with established biological roles found in two (pink), three (yellow),  
996 or all four (red) data-subsets.

997 (E) Stepwise analysis leading from the 3,722 human cNPC-enriched protein-coding  
998 genes to the identification of 54 primate-specific genes.

999

1000 **Fig. 2. Occurrence of the primate-specific genes in the various primate clades.**

1001 Assignment of the 54 primate-specific genes to a primate clade, based on the primate  
1002 genome(s) in which an intact reading frame was found in the present analysis. Clades  
1003 are specified on the top left. The color-coding and brackets indicate the species in each  
1004 clade analyzed in the present study. Note that the occurrence of the genes in the various  
1005 clades does not necessarily apply to every species in the clade.

1006

1007 **Fig. 3. Evolutionary origin of the *PTTG2* gene.**

1008 (A) Origin of the *PTTG2* gene by reverse transcription of the *PTTG1* mRNA and  
1009 insertion as a retroposon into the *TBC1D1* locus in the ancestor to New-World monkeys,  
1010 Old-World monkeys and apes (Simiiformes).

1011 (B) Comparison of the PTTG1 and hominoidea PTTG2 polypeptides, and of the  
1012 prematurely closed open reading frames of non-ape simiiformes *PTTG2*.

1013

1014 **Fig. 4. Evolution of the human-specific cNPC-enriched protein-coding genes.**

1015 Diagrams depicting the evolutionary origin of the 13 human-specific genes.

1016 (A) Duplication of the entire ancestral gene, which applies to nine of the human-specific  
1017 genes. *NOTCH2NL* is included in this group because it arose by entire duplication of a

1018 short *NOTCH2* splice variant; the latter, however, comprises only parts of the *NOTCH2*

1019 gene (hence the asterisk). Note that the gene duplication giving rise to *SMN2* occurred

1020 after the Neandertal – modern human lineage split, whereas the other eight gene

1021 duplications occurred before that split (Dennis et al., 2017).

1022 (B) Partial gene duplication (~5 Mya) giving rise to *ARHGAPI1B* (Antonacci et al.,

1023 2014; Dennis et al., 2017; Riley et al., 2002). Note that a single C→G substitution in

1024 exon 5 (red box), which likely occurred after the gene duplication event but before the

1025 Neandertal – modern human lineage split, created a new splice donor site, causing a

1026 reading frame shift that resulted in a novel, human-specific 47 amino acid C-terminal

1027 sequence (Florio et al., 2015; Florio et al., 2016).



1028 (C) Exon duplication and replacement giving rise to human *ZNF492*. Exon 4 of *ZNF98*  
1029 (blue) is duplicated and inserted into intron 3 of *ZNF492* (orange), rendering the  
1030 original *ZNF492* exon 4 a pseudoexon.

1031 (D) Removal of a stop codon converting the non-coding *FAM182B* of non-human  
1032 primates into the protein-coding human *FAM182B*. A single T→G substitution removes  
1033 the stop codon at the 5' end of exon 3, thereby generating an open reading frame  
1034 (purple).

1035 (E) Validation of the human-specific nature of selected human genes by determination  
1036 of their copy numbers. Human (blue), chimpanzee (orange) and bonobo (yellow)  
1037 genomic DNA was used as template to perform a qPCR that would generate two  
1038 distinct amplicons of both, the gene common to all three species (black regular letters)  
1039 and the human-specific gene(s) under study (red bold letters), as indicated. The relative  
1040 amounts of amplicons obtained for each of the four gene groups are depicted with the  
1041 amounts of amplicons obtained with the bonobo genomic DNA as template being set to  
1042 1.0. Note that compared to chimpanzee and bonobo genomic DNA, the copy number in  
1043 human genomic DNA is (i) two-fold higher for *ARHGAP11*, consistent with the  
1044 presence of the human-specific gene *ARHGAP11B* in addition to the common gene

1045 *ARHGAP11A*; (ii) four-fold higher for *FAM72*, consistent with the presence of the  
1046 human-specific genes *FAM72B*, *FAM72C* and *FAM72D* in addition to the common  
1047 gene *FAM72A*; (iii) three-fold higher for *GTF2H2*, consistent with the presence of the  
1048 human-specific genes *GTF2H2B* (black bold letters, not among the cNPC-enriched  
1049 genes identified in this study) and *GTF2H2C* in addition to the common gene  
1050 *GTF2H2A*; and (iv) two-fold higher for *SMN*, consistent with the presence of the  
1051 human-specific gene *SMN2* in addition to the common gene *SMN1*.

1052

1053 **Fig. 5. In-situ hybridization analysis of the mRNA levels of the human-specific**  
1054 **cNPC-enriched protein-coding genes in the various zones of the fetal neocortical**  
1055 **wall.**

1056 Coronal sections of human fetal neocortex (13wpc) were subjected to ISH using probes  
1057 either specific for the mRNA of the human-specific gene under study (B, C, F) or  
1058 recognizing the mRNAs of both the human-specific gene(s) and the paralog gene  
1059 common to other primates as well (A, D, E, G, H, I, J). The five patterns of preferential  
1060 mRNA expression in the various zones of the fetal neocortical wall (see labeling on the  
1061 left and red dashed lines) are indicated above the images. Green, yellow and orange

1062 boxes indicate areas of the VZ, SVZ and CP, respectively, that are shown at higher  
1063 magnification in the respective images labeled "", " and ' on the right. Scale bars, 100  
1064  $\mu\text{m}$ .

1065

1066 **Fig. 6. In-situ hybridization analysis of the mRNA levels of 3 selected**  
1067 **primate-specific genes in the various zones of the fetal human neocortical wall.**

1068 Coronal sections of human fetal neocortex (13wpc) were subjected to ISH using probes  
1069 recognizing the mRNAs of either both, the human cNPC-enriched protein-coding gene  
1070 under study that has orthologs specific to non-human primates (**A**, *PTTG2*; **C**, *KIF4B*)  
1071 and the paralog gene common to non-primates as well (**A**, *PTTG1*; **C**, *KIF4A*), or the  
1072 human cNPC-enriched protein-coding gene *MICA* that has orthologs specific to  
1073 non-human primates and a paralog specific to primates, *MICB* (**B**). The pattern of  
1074 preferential mRNA expression of the 3 genes under study in the various zones of the  
1075 fetal neocortical wall (see labeling on the left and red dashed lines) is indicated above  
1076 the images. Green, yellow and orange boxes indicate areas of the VZ, SVZ and CP,  
1077 respectively, that are shown at higher magnification in the respective images labeled "",  
1078 " and ' on the right. Scale bars, 100  $\mu\text{m}$ .

1079 **Fig. 7. Comparison of the mRNA expression of 11 human-specific cNPC-enriched**  
1080 **protein-coding genes with their ancestral paralogs in isolated cell populations**  
1081 **enriched in aRG, bRG and neurons from fetal human neocortex.**

1082 A previously published genome-wide transcriptome dataset obtained by RNA-Seq of  
1083 cell populations isolated from fetal human neocortex, that is, aRG (orange) and bRG  
1084 (yellow) in S-G2-M and a fraction enriched in neurons but also containing bRG in G1  
1085 (N, purple) (Florio et al., 2015), was analyzed for the abundance of mRNA-Seq reads  
1086 assigned to either the indicated human-specific gene(s) under study (blue background)  
1087 or the corresponding ancestral paralog (white background), using the Kallisto algorithm.  
1088 **(A)** Min-max box-and-whiskers plots showing mRNA levels (expressed in Transcripts  
1089 Per Million, TPM); red lines indicate the median.  
1090 **(B)** Stacked bar plots showing the cumulative mRNA expression levels in the indicated  
1091 cell types (sum of the median TPM values shown in (A)).

1092

1093

1094 **Fig. S1. Forced expression of *NOTCH2NL* in mouse embryonic neocortex increases**

1095 **cycling basal progenitors.**

1096 The neocortex of E13.5 mouse embryos was in utero co-electroporated with a plasmid

1097 encoding GFP together with either an empty vector (Control) or a *NOTCH2NL*

1098 expression plasmid (*NOTCH2NL*), all under constitutive promoters, followed by

1099 analysis 48 hours later.

1100 **(A)** GFP (green) and Ki67 (magenta) double immunofluorescence combined with DAPI

1101 staining (grey) of control (left) and *NOTCH2NL*-electroporated (right) neocortex.

1102 **(B)** Quantification of the percentage of targeted, i.e. GFP+, cells that are Ki67+ in the

1103 VZ, SVZ and IZ upon control (white bars) and *NOTCH2NL* (black bars)

1104 electroporation.

1105 **(C)** GFP (green) and phosphohistone H3 (PH3) double immunofluorescence of control

1106 (left) and *NOTCH2NL*-electroporated (right) neocortex.

1107 **(D, E)** Quantification of the number of ventricular **(D)** and abventricular **(E)** targeted

1108 (GFP+) cells in mitosis (PH3+) in a 200  $\mu\text{m}$ -wide microscopic field upon control (white

1109 bars) and *NOTCH2NL* (black bars) electroporation.

1110 **(A, C)** Images are a single 2- $\mu\text{m}$  optical sections. Scale bars, 50  $\mu\text{m}$ .

1111 **(B, D, E)** Data are the mean of 10 embryos each, with 2-4 cryosections (**B**, 100  
1112  $\mu\text{m}$ -wide microscopic field) per embryo counted and averaged. Error bars indicate  
1113 SEM; \*,  $P < 0.05$ ; Student's  $t$ -test in **B** (VZ:  $P = 0.914$ ,  $df = 18$ ,  $t = 0.108$ ; SVZ:  $P =$   
1114  $0.012$ ,  $df = 18$ ,  $t = 2.731$ ; IZ:  $P = 0.020$ ,  $df = 18$ ,  $t = 2.501$ ), **D** ( $P = 0.718$ ,  $df = 18$ ,  $t =$   
1115  $0.3656$ ) and **E** ( $P = 0.011$ ,  $df = 18$ ,  $t = 2.841$ ).

1116

1117 **Fig. S2. ARHGAP11B-specific ISH probe.**

1118 **(A)** Nucleotide sequences at the exon 5 (purple background) – exon 6 (orange  
1119 background) junction of the *ARHGAP11B* (top) and *ARHGAP11A* (bottom) mRNAs  
1120 (note that U is depicted as T). The *ARHGAP11B* LNA ISH probe shown is are  
1121 complementary to the nucleotides shown in red. The 55 nucleotides shown in green are  
1122 unique to the 3'-end of the *ARHGAP11A* exon 5 and interfere with the binding of the  
1123 LNA ISH probe to the *ARHGAP11A* mRNA, rendering the probe  
1124 *ARHGAP11B*-specific.

1125 **(B)** Images of COS-7 cells that were either untransfected, or transfected with either an  
1126 *ARHGAP11A*- or *ARHGAP11B*-expressing construct and stained with the *ARHGAP11B*  
1127 LNA ISH probe. Note that an ISH signal is detected only in *ARHGAP11B*-transfected

1128 COS-7 cells, confirming the specificity of the LNA ISH probe for *ARHGAP11B*. Scale  
1129 bar, 50  $\mu$ m.

1130

1131 **Fig. S3. Comparison of the paralog-specific mRNA expression between 11**  
1132 **human-specific cNPC-enriched genes and their respective ancestral paralog in**  
1133 **aRG, bRG and neuron-enriched cell populations from fetal human neocortex.**

1134 (A) Diagram outlining the strategy used to ascertain paralog-specific mRNA expression  
1135 in a given cell type of interest. mRNA sequences of an ancestral vs. a human-specific  
1136 paralog (paralog A vs. B in the example shown) were aligned, and the homologous, yet  
1137 distinct, core sequences of each alignment were extracted. The corresponding sequences  
1138 of each paralog were used as a mapping reference for RNA-Seq reads from aRG, bRG  
1139 and neuron-enriched cell populations from fetal human neocortex (Florio et al., 2015).  
1140 Only reads aligning to “unique mappers”, i.e. paralog-specific sites (SNPs or indels),  
1141 were used for the analysis shown in (B). In the example shown, paralog-specific reads  
1142 specific for paralog A or paralog B, as defined by the paralog-specific base (vertical  
1143 yellow line) are colored in purple and orange, respectively.

1144 **(B)** Bar plots showing the total numbers of paralog-specific RNA-Seq reads (identified  
1145 as described in (A)) found in aRG vs. bRG vs. neuron-enriched (N) cell populations  
1146 from fetal human neocortex (Florio et al., 2015). Grey bars indicate human-specific  
1147 genes; black bars indicate their respective ancestral paralog. Data are the mean of four  
1148 individual samples isolated from two human specimens; errors bars, SD.

1149

1150 **Fig. S4. Cell-type specificity of mRNA expression of splice variants encoded by 10**  
1151 **human-specific cNPC-enriched genes.**

1152 Heatmaps showing TPM expression levels (see color keys) of all protein-coding splice  
1153 variants encoded by the indicated human-specific cNPC-enriched genes in aRG, bRG  
1154 and neuron-enriched (N) cell populations from fetal human neocortex (Florio et al.,  
1155 2015). See Table S4 for mRNA expression data for each cell type and splice variant,  
1156 including non-coding transcripts. Human-specific genes are grouped based on orthology,  
1157 and splice variants (indicated by NCBI transcript IDs) encoded by the respective  
1158 cNPC-enriched human-specific gene(s) are grouped together. Note the specific  
1159 expression of ENST00000428041, a splice variant of *ARHGAP11B* uniquely expressed



1160 in bRG. Splice variant-specific mRNA expression was assessed using the Kallisto

1161 algorithm.

1162

1163 **Tables**

1164

1165 **Table 1 Primate-specific genes**

1166

1167 **Table S1 cNPC-enriched genes**

1168

1169 **Table S2 qPCR primer**

1170

1171 **Table S3 Primer for ISH probes**

1172

1173 **Table S4 mRNA expression data of splice variants**

1174 **Supplementary files**

1175

1176 **File S1 ANKRD20A alignment**

1177

1178 **File S2 ARHGAP11 alignment**

1179

1180 **File S3 CBWD alignment**

1181

1182 **File S4 DHRS4 alignment**

1183

1184 **File S5 FAM72 alignment**

1185

1186 **File S6 GTF2H2 alignment**

1187

1188 **File S7 NOTCH2 alignment**

1189

1190 **File S8 ZNF98 alignment**

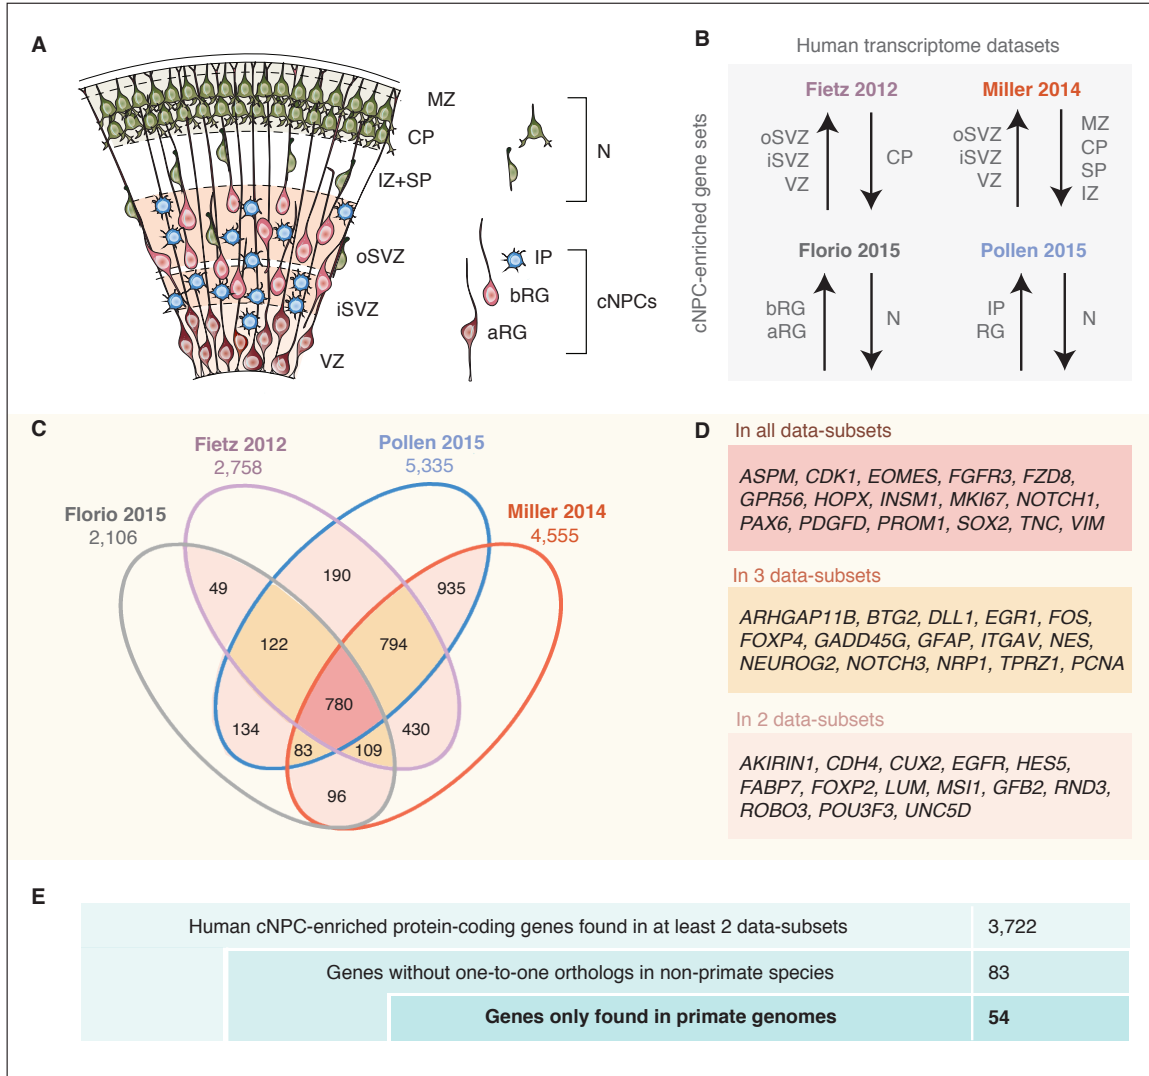

Figure 1

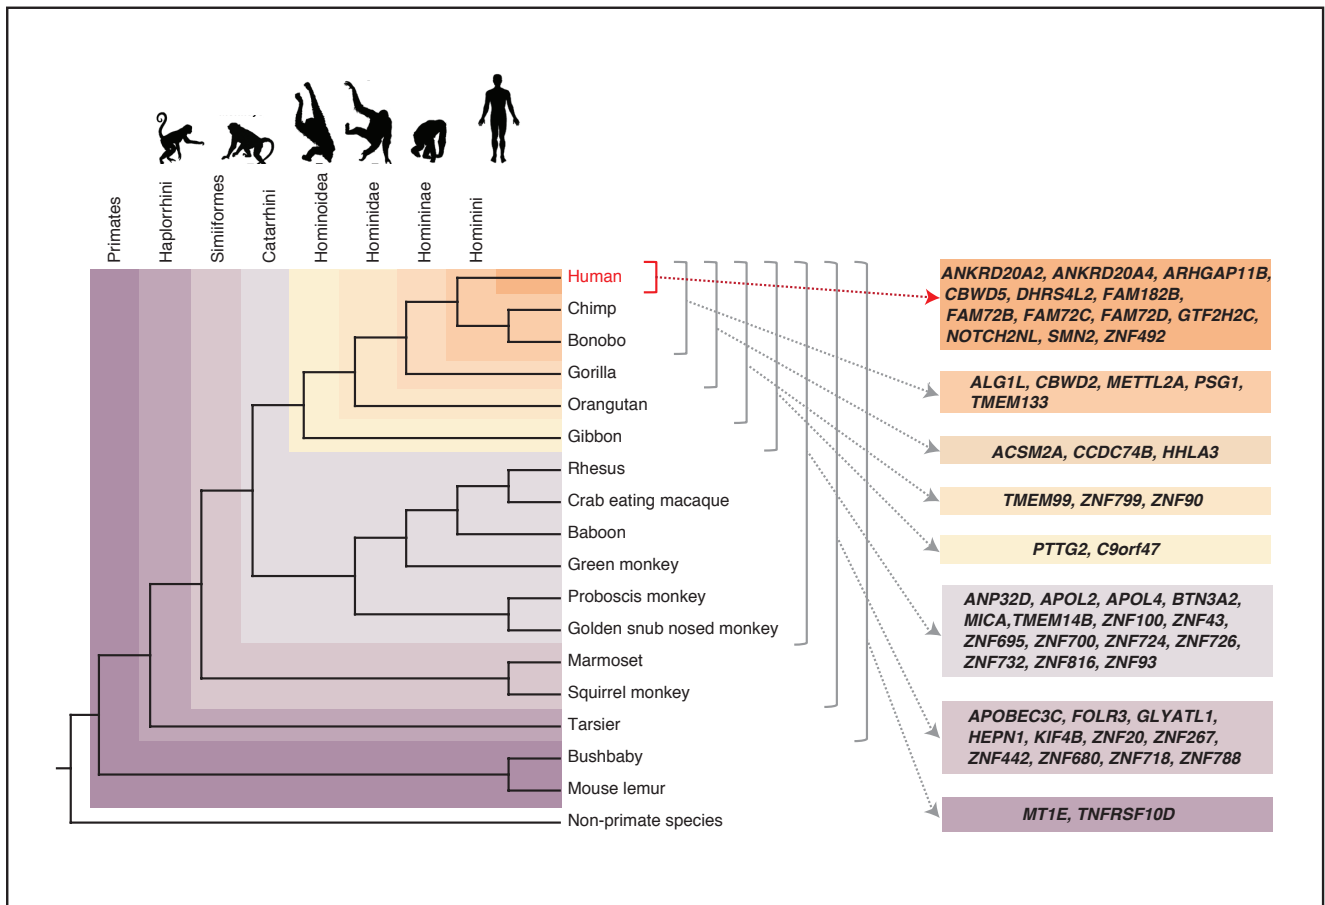

Figure 2

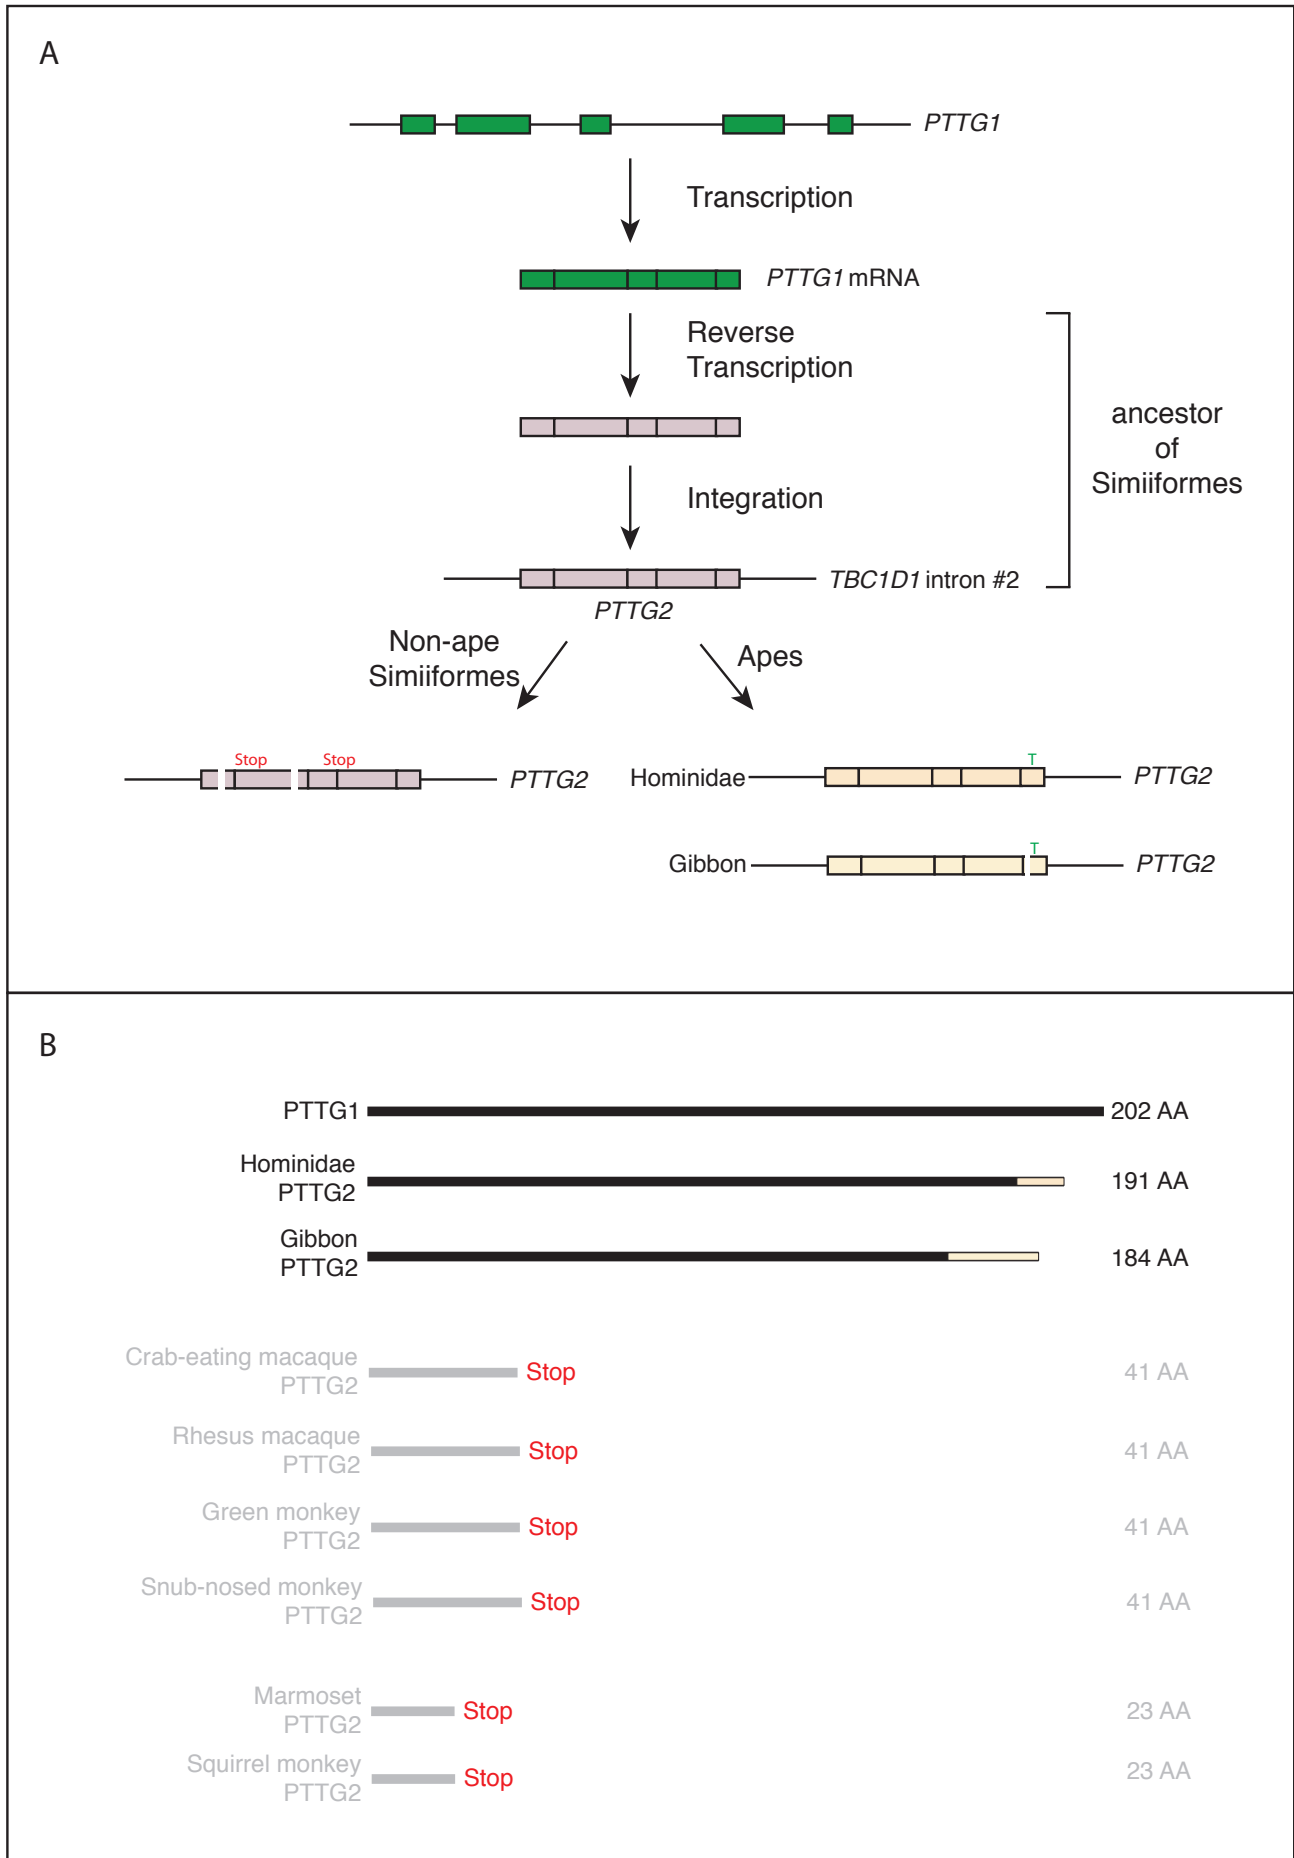

Figure 3

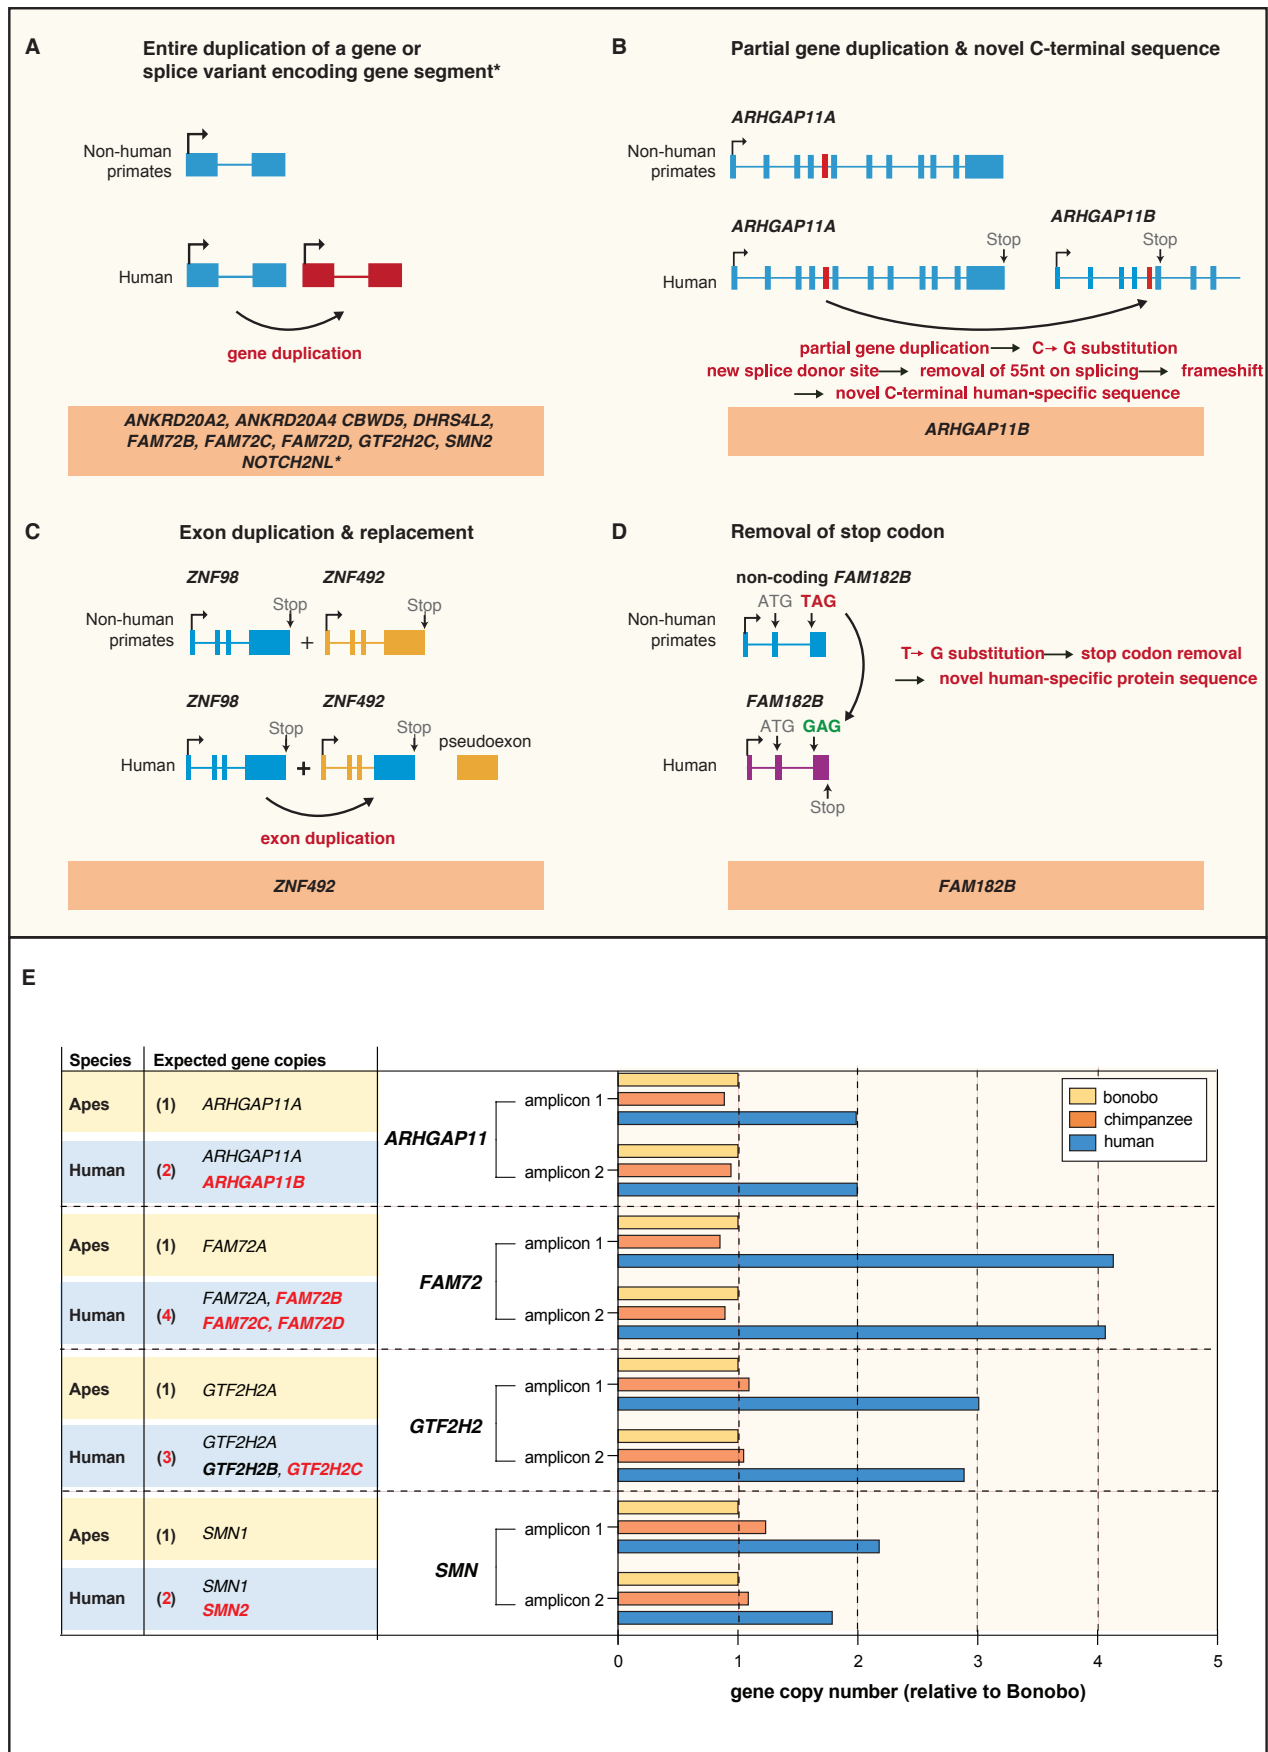

Figure 4

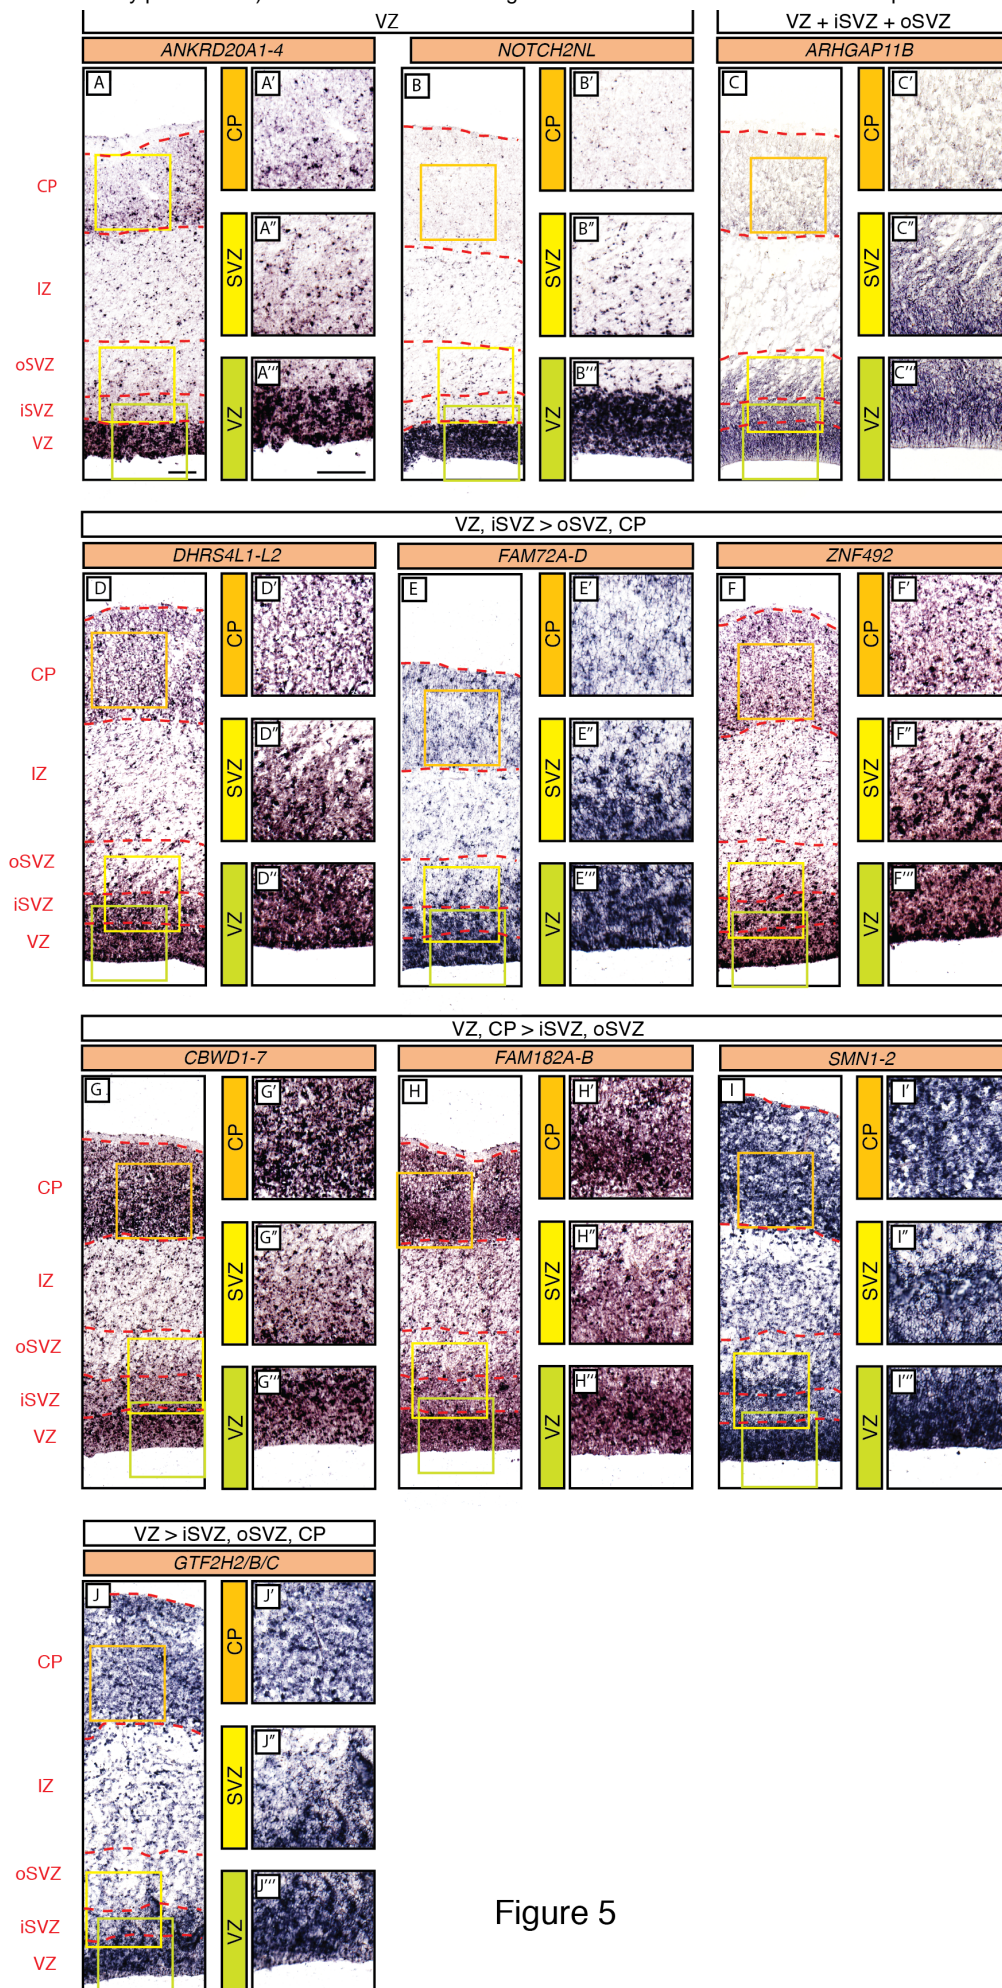

Figure 5



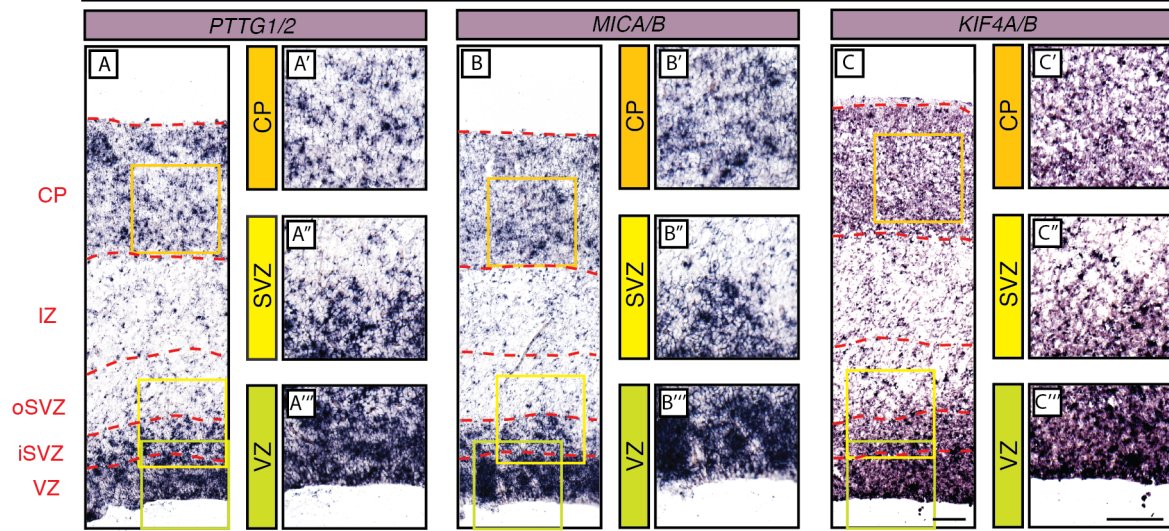

Figure 6



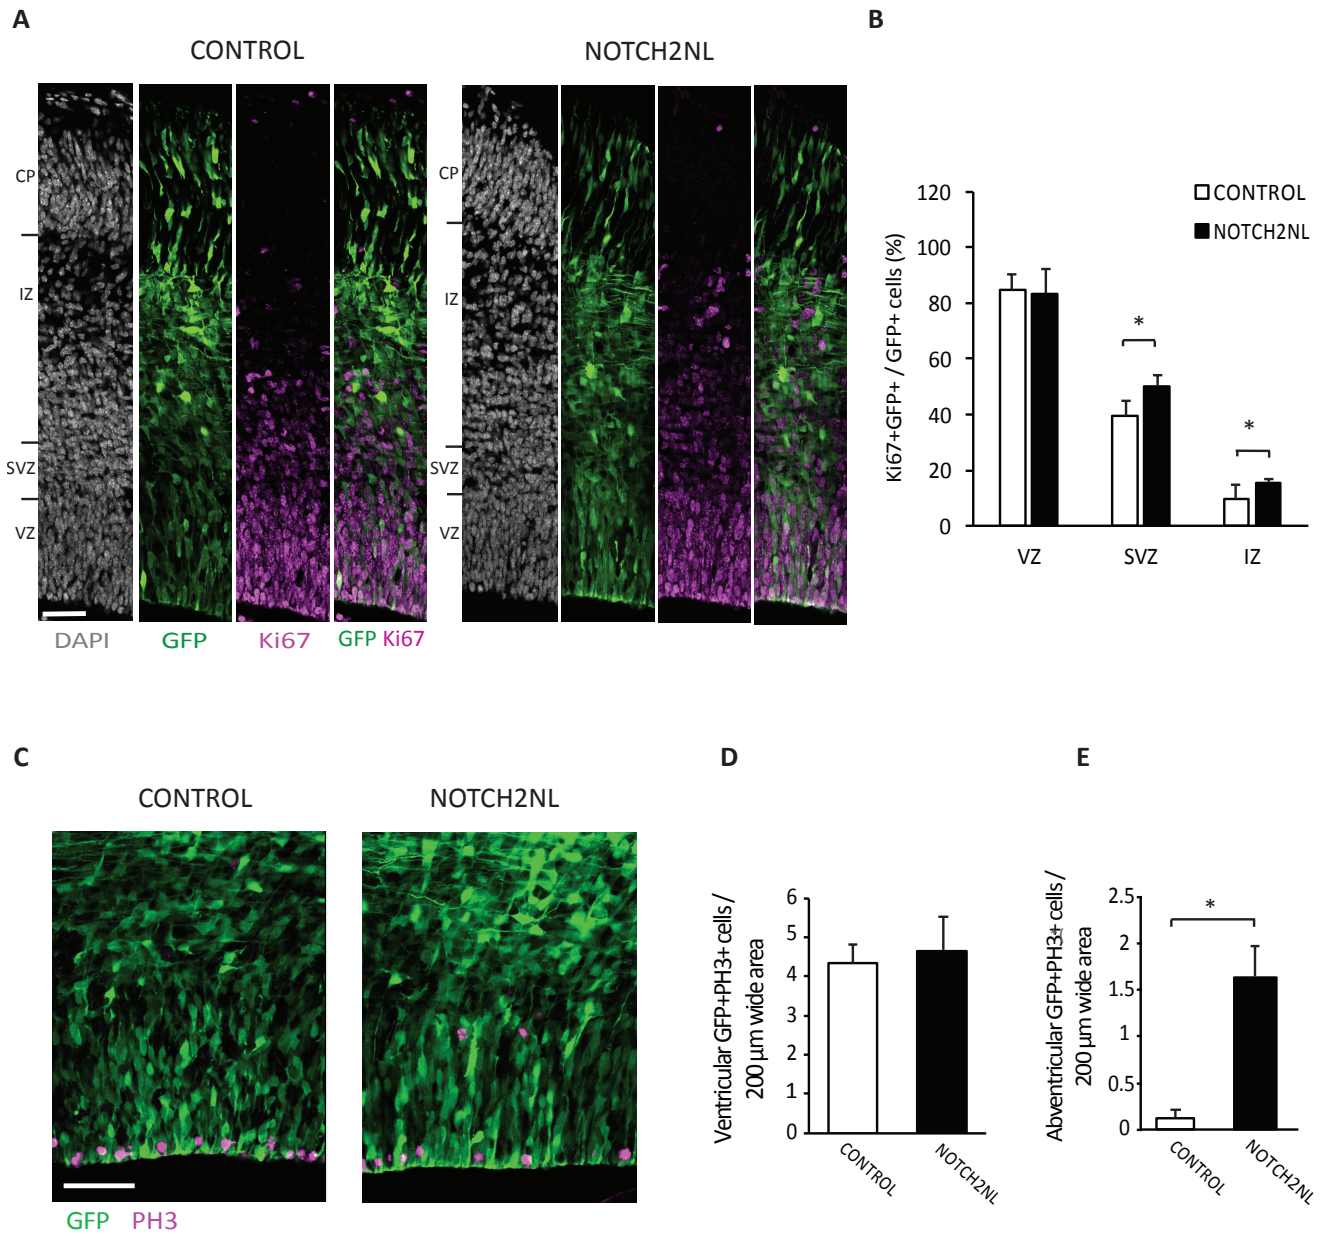

Figure S1

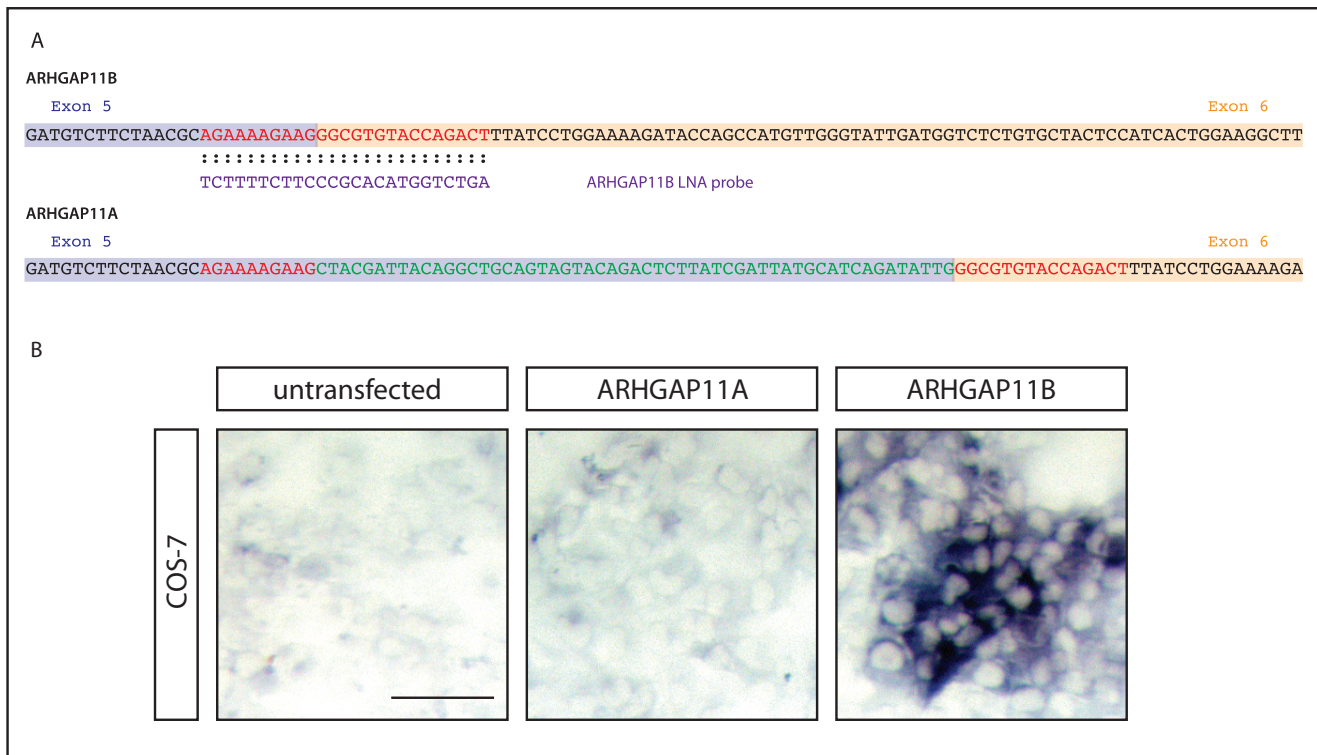

Figure S2

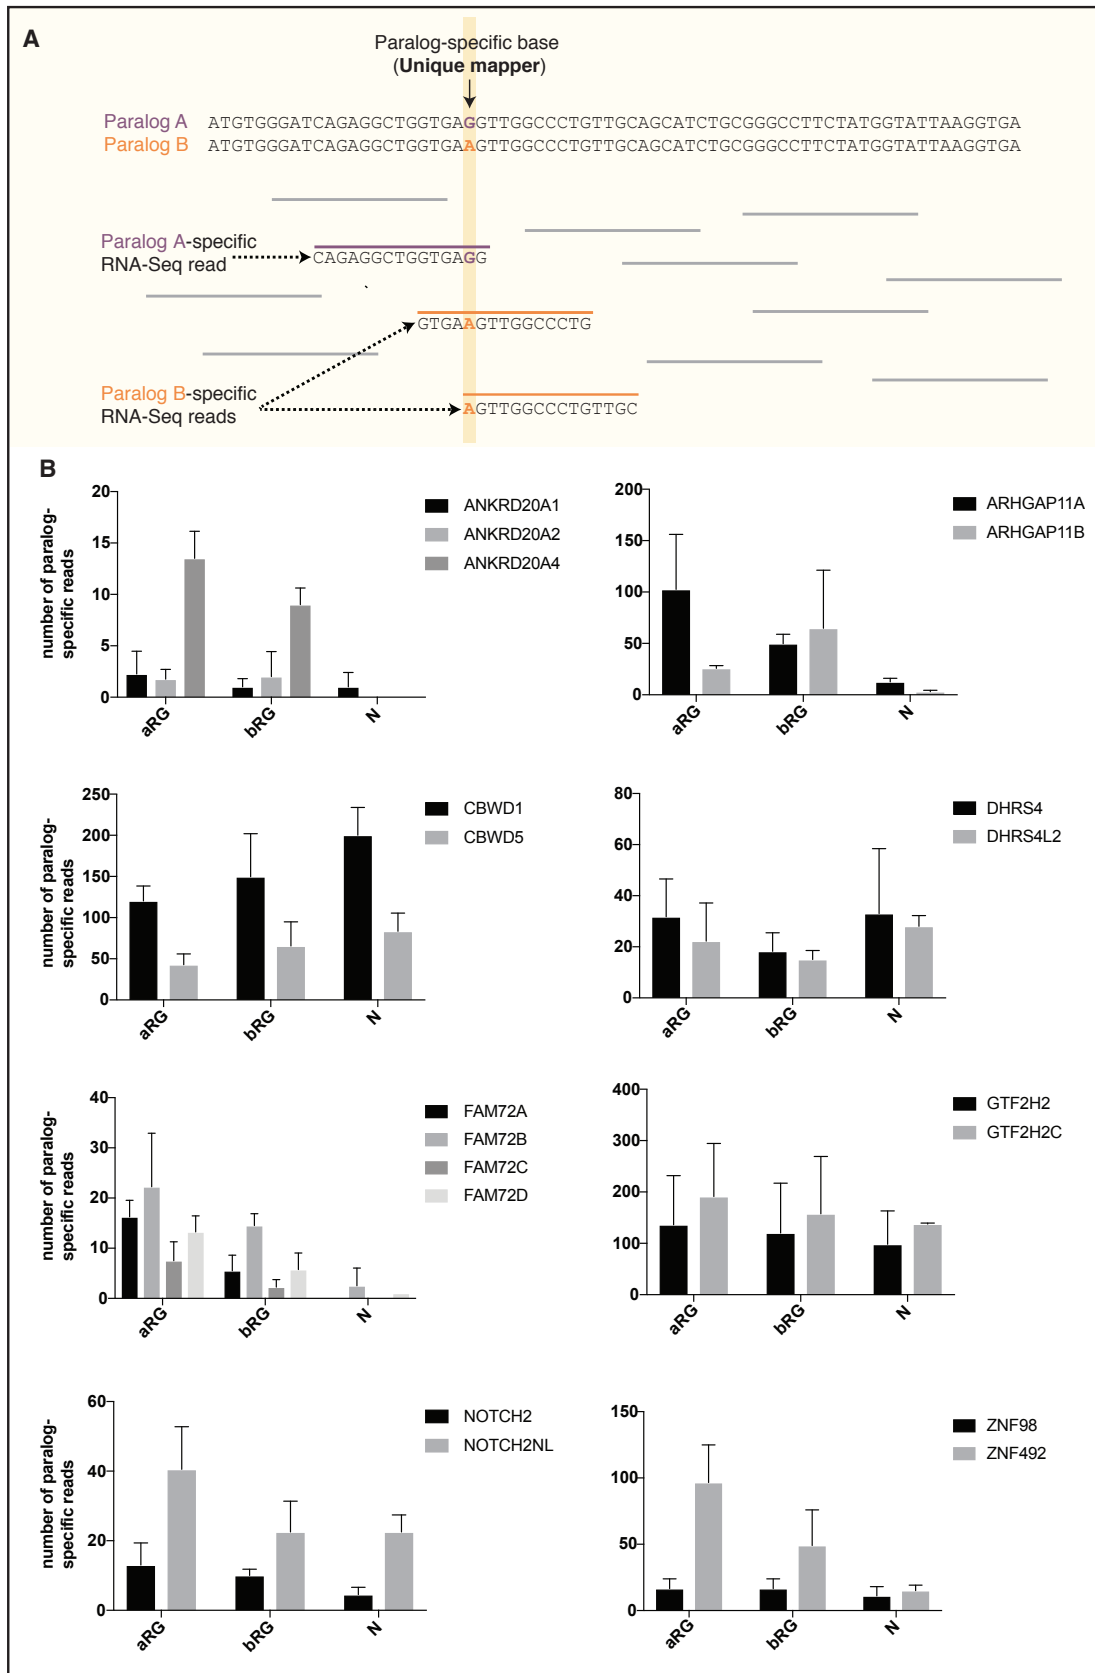

Figure S3

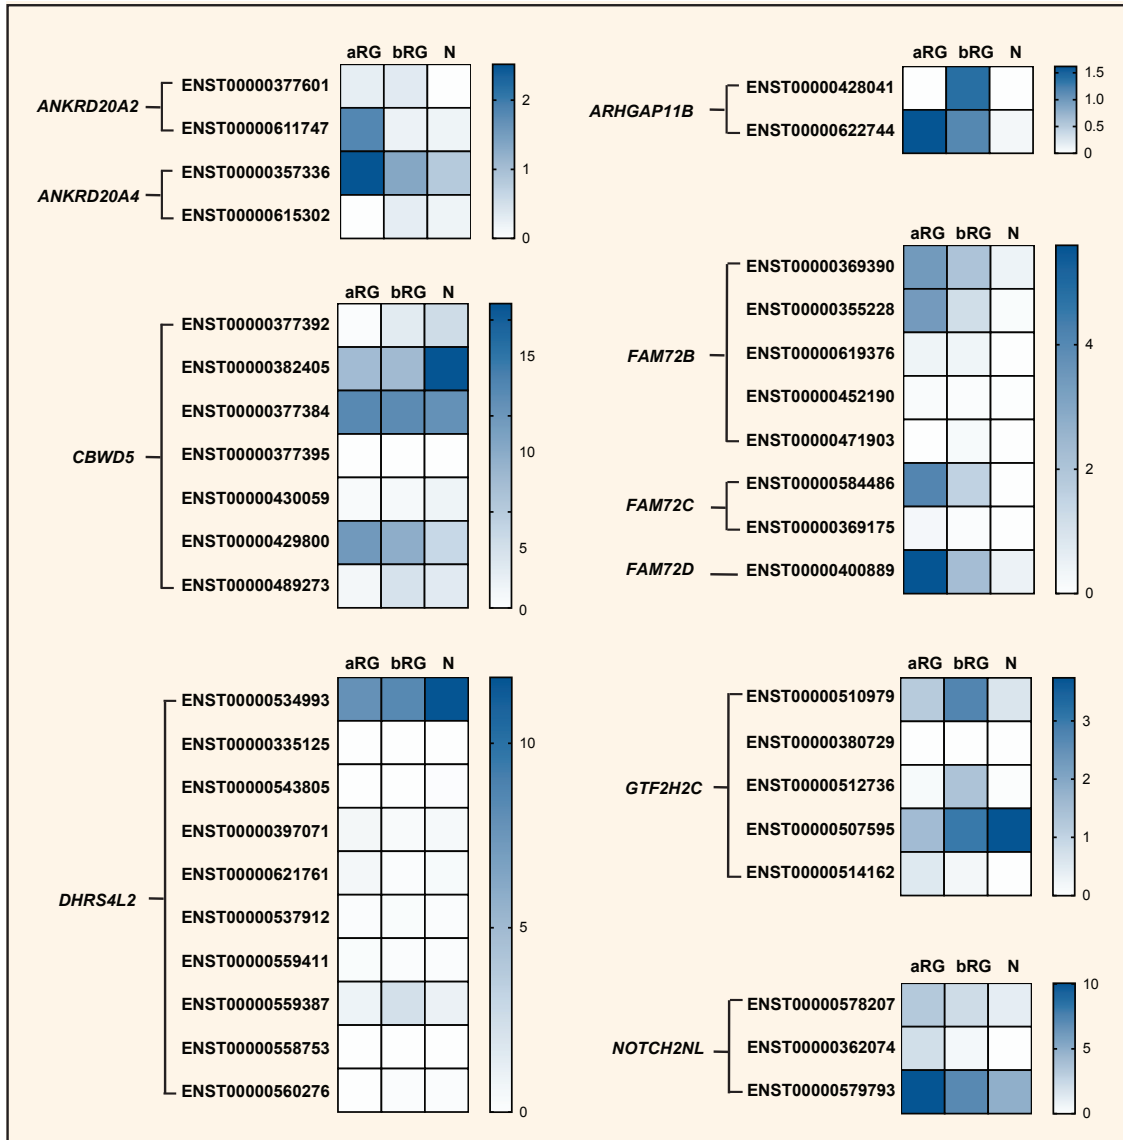

Figure S4
